1 Title

2 Dopamine influences attentional rate modulation in Macaque posterior parietal cortex

3 Authors

4 Jochem van Kempen<sup>1\*</sup>, Christian Brandt<sup>2</sup>, Claudia Distler<sup>3</sup>, Mark A. Bellgrove<sup>4</sup>, Alexander

5 Thiele<sup>1</sup>

6 Affiliations

7 <sup>1</sup> Biosciences Institute, Newcastle University, NE1 7RU, Newcastle upon Tyne, United

8 Kingdom.

9 <sup>2</sup> Research Unit for ORL – Head & Neck Surgery and Audiology, Odense University

10 Hospital, Odense, Denmark; University of Southern Denmark, Odense, Denmark

11 <sup>3</sup> Allgemeine Zoologie und Neurobiologie, Ruhr-Universität Bochum, 44801 Germany

12 <sup>4</sup> Turner Institute for Brain and Mental Health, School of Psychological Sciences, Monash

13 University, Melbourne, Victoria 3800, Australia.

14 \* [Jochem.van-kempen@newcastle.ac.uk](mailto:Jochem.van-kempen@newcastle.ac.uk)

## 15 Abstract

16 Cognitive neuroscience has made great strides in understanding the neural substrates of  
17 attention, but our understanding of its neuropharmacology remains incomplete. Although  
18 dopamine has historically been studied in relation to frontal functioning, emerging evidence  
19 suggests important dopaminergic influences in parietal cortex. We recorded single- and  
20 multi-unit activity whilst iontophoretically administering dopaminergic agonists and  
21 antagonists while rhesus macaques performed a spatial attention task. Out of 88 units, 50  
22 revealed activity modulation by drug administration. Dopamine inhibited firing rates  
23 according to an inverted-U shaped dose-response curve and increased gain variability.  
24 Dopamine modulated attention-related rate changes and Fano Factors in broad and narrow-  
25 spiking units, respectively. D1 receptor antagonists diminished firing rates according to a  
26 monotonic function and interacted with attention modulating gain variability in broad-spiking  
27 units. Finally, both drugs decreased the pupil light reflex. These data show that dopamine  
28 shapes neuronal responses and modulates attentional processing in parietal cortex.

29

## 30 Keywords

31 Dopamine, iontophoresis, parietal cortex, pupil light reflex, SCH23390

32

## 33 Introduction

34 Selective attention refers to prioritization of behaviorally relevant, over irrelevant, sensory  
35 inputs. Convergent evidence from human neuropsychological, brain imaging and non-human  
36 primate studies shows that fronto-parietal networks are crucial for selective attention

37 (Corbetta and Shulman, 2011; Desimone and Duncan, 1995; Posner, 1990). Neuromodulation  
38 of attention-related activity in these networks occurs at least in part via glutamatergic  
39 (Dasilva et al., 2021; Herrero et al., 2013) and cholinergic inputs (Dasilva et al., 2019; Furey  
40 et al., 2008; Herrero et al., 2008; Levin and Simon, 1998; Nelson et al., 2005; Parikh et al.,  
41 2007; Sarter et al., 2005; Warburton and Rusted, 1993). Multiple lines of evidence, however,  
42 also suggest dopaminergic modulation (Bellgrove and Mattingley, 2008; Noudoost and  
43 Moore, 2011a; Soltani et al., 2013; Thiele and Bellgrove, 2018). Here we sought to  
44 understand how dopamine (DA) applied to macaque posterior parietal cortex (PPC)  
45 modulates attention-related activity.

46 The functional significance of DA is well established for a number of brain areas, particularly  
47 the frontal cortex (executive control) and basal ganglia (motor control). For these regions,  
48 substantial across-species similarities allowed the development of mechanistic models with  
49 clinical translational value for various disorders (e.g., Parkinson's disease, schizophrenia or  
50 attention deficit hyperactivity disorder (ADHD)) (Arnsten et al., 2012; Thiele and Bellgrove,  
51 2018). Species differences with respect to dopaminergic innervation do however exist for  
52 posterior cortical areas, including the PPC. Although sparse in rodents, dopaminergic  
53 innervation of parietal areas in non-human primates is comparable in strength and laminar  
54 distribution to prefrontal regions (Berger et al., 1991). Moreover, macaque PPC has high  
55 densities of DA transporter (DAT) immunoreactive axons (Lewis et al., 2001). These  
56 observations align with dense dopaminergic receptor expression in human PPC (Caspers et  
57 al., 2013) and imaging studies of clinical disorders where medications targeting DA receptors  
58 or transporters modulate parietal activity (Mehta et al., 2000). Given these data and the  
59 clinical significance of PPC function, greater understanding of dopaminergic effects in this  
60 region is warranted.

61 Selective attention relies heavily on PPC integrity and multiple lines of evidence suggest that  
62 DA modulates attentional processes related to parietal function. First, DA agonists reduce  
63 spatial inattention in neurological (Gorgoraptis et al., 2012) and psychiatric patients with  
64 disorders such as schizophrenia (Maruff et al., 1995) and ADHD (Bellgrove et al., 2008; Silk  
65 et al., 2014). Second, psychopharmacological studies in healthy volunteers suggest that DA  
66 antagonists modulate parameters of spatial cueing paradigms (e.g. validity effect), often  
67 associated with parietal function (Clark et al., 1989). Third, DNA variation in a  
68 polymorphism of the DA transporter gene (DAT1) is associated with individual differences  
69 in measures of spatial selective attention (Bellgrove et al., 2009, 2007; Newman et al., 2014).  
70 Fourth, non-human primate studies revealed dopaminergic contributions to working memory  
71 signals in dorsolateral prefrontal cortex (dlPFC) (Williams and Goldman-Rakic, 1995), and  
72 modulation of dopaminergic signaling in frontal eye fields (FEF) affects V4 neurons in a  
73 manner similar to attention and biases behavioral choices (Noudoost and Moore, 2011a;  
74 Soltani et al., 2013). DA thus contributes to working memory, target selection and probably  
75 also spatial attention in dlPFC and FEF (Clark and Noudoost, 2014; Noudoost and Moore,  
76 2011a, 2011b; Williams and Goldman-Rakic, 1995). Both areas are critical nodes of fronto-  
77 parietal attention networks. In summary, while dopaminergic influences on frontal circuits  
78 are comparatively well understood, their effect on attention-related activity in PPC is yet to  
79 be established.

80 Here we sought to address this knowledge gap by locally infusing DA or the selective D1  
81 receptor (D1R) antagonist SCH23390 into the PPC of two macaque monkeys during a  
82 selective attention task. We showed that single and multi-unit (SU, MU) activity is inhibited  
83 by iontophoresis of dopaminergic drugs into intraparietal sulcus (IPS) gray matter and that  
84 drug application increased trial-to-trial excitability fluctuations, termed gain variability  
85 (Goris et al., 2014). The effects of the non-selective agonist DA followed an inverted U-

86 shaped dose-response curve, whereas the dose-response curve of the D1-selective antagonist  
87 SCH23390 followed a monotonic function. Additionally, we found cell-type specific effects  
88 on attentional modulation whereby DA affected attention-related activity and Fano Factors in  
89 broad-spiking and narrow-spiking units, respectively, whereas SCH23390 application  
90 affected attention-related gain variability changes in broad-spiking units only. Finally, both  
91 drugs reduced the pupillary light reflex.

92

## 93 Results

94 We recorded activity from 88 single and multi-units from intraparietal sulcus (IPS) in two  
95 awake, behaving Macaque monkeys performing a selective attention task (Figure 1). Of these  
96 units, 74 (84.1%) were modulated by attention, as measured during the 500 ms before the  
97 first dimming event (see Figure 2). During recording, we used an electrode-pipette  
98 combination to iontophoretically administer dopaminergic drugs in the vicinity of the  
99 recorded cells (Thiele et al., 2006). Across the two monkeys, we recorded from 59 units  
100 whilst administering the unselective agonist DA and from 29 units during which we  
101 administered the selective D1R antagonist SCH23390. Firing rates in 36 (61%) and 14  
102 (48.3%) units were modulated by application of DA and SCH23390, respectively. Of these  
103 drug-modulated units, 31 (52.5%) and 14 (48.3%) were also modulated by attention. Thus,  
104 approximately half the total units were modulated both by attention and drug application.  
105 These proportions are comparable to cholinergic modulation of attention induced activity in  
106 macaque V1 and FEF (Dasilva et al., 2019; Herrero et al., 2008), and glutamatergic  
107 modulation in FEF (Dasilva et al., 2021). As expected given the focal nature of micro-  
108 iontophoretic drug application (Herz et al., 1969), and in line with comparable studies (Jacob

109 et al., 2016, 2013), there were no behavioral effects of drug application (i.e., reaction times)  
110 (Supplementary figure 1).

111

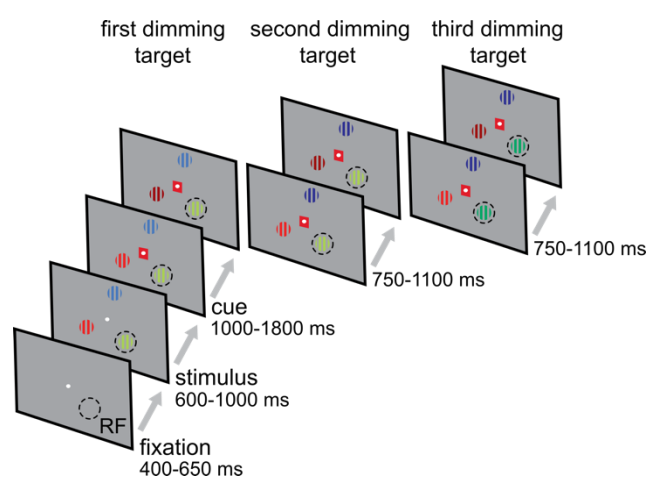

112

113 Figure 1. Behavioral paradigm. The monkey held a lever and fixated on a central fixation spot to initiate the  
114 trial. One of three colored gratings was presented inside the receptive field (RF) of the neurons under study.  
115 After a variable delay a cue matching one of the grating colors surrounded the fixation spot, indicating which  
116 grating was behaviorally relevant (target). In pseudorandom order the stimuli decreased in luminance (dimmed).  
117 Upon dimming of the target, the monkey had to release the lever to obtain a reward.

118

119 Figure 2A illustrates the population activity (from all units) aligned to stimulus onset, cue  
120 onset and the first-dimming event, for both the no-drug and the drug conditions. For a given  
121 drug condition, neural activity between attention conditions did not differ when aligned to  
122 stimulus onset but started to diverge approximately 200 ms after cue onset, indicating which  
123 of the three gratings was behaviorally relevant on that trial, and diverged further leading up to  
124 the first dimming event. Across the population, DA strongly reduced firing rates throughout  
125 the duration of the trial, including during baseline periods as well as stimulus and cue  
126 presentation. The effects of SCH23390 were of the same sign but weaker. Control recordings  
127 (saline with matched pH) to control for pH or current related effects did not reveal any effects

128 on firing rates (Supplementary figure 2), and thus exclude the possibility that drug effects  
129 were the result of recording or application methods. Although drug induced changes to  
130 attentional modulation of neural activity appear relatively small at the population level, a  
131 subset of neurons revealed an interaction between attention and drug application (n=9), as  
132 illustrated for an example neuron in Figure 2B, and these effects depended on the cell types  
133 affected (further delineated below). Next, we examined units that were modulated by  
134 attention and/or drug application and investigated whether activity modulation due to  
135 attention and drug application mapped onto different cell types.

136 Cells were classified as narrow or broad-spiking cells according to the median duration of the  
137 peak-to-trough time of the spike waveforms (Figure 3A & B). These cell types have  
138 previously been found to respond differently to dopaminergic drug application in frontal  
139 cortex (Jacob et al., 2016, 2013). Although narrow and broad-spiking cells have been argued  
140 to respectively constitute inhibitory interneurons and excitatory pyramidal cells (Mitchell et  
141 al., 2007), a more recent study found that output cells in primary motor cortex (unequivocal  
142 pyramidal cells) had a narrow action potential waveform (Vigneswaran et al., 2011), and  
143 most pyramidal cells in macaque motor cortex express the Kv3.1b potassium channel,  
144 associated with the generation of narrow spikes (Soares et al., 2017). Therefore, the narrow-  
145 broad categorization distinguishes between two different cell type categories, without  
146 mapping this classification specifically onto interneurons or pyramidal cells.

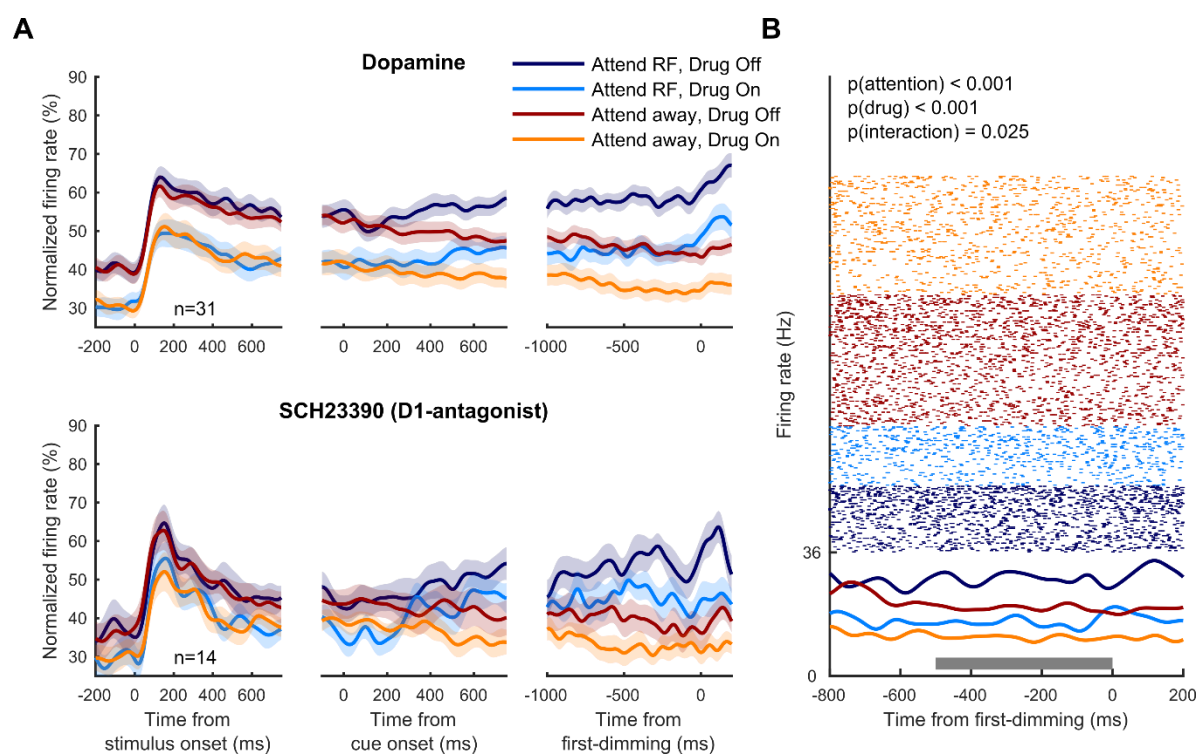

147

148 Figure 2. Population activity and example unit. **(A)** Population histograms for all units recorded during  
149 dopaminergic drug application selective for attention and drug application. Population activity aligned to  
150 stimulus onset (left), cue onset (middle) and the first dimming event (right), for the non-specific agonist  
151 dopamine (top) and the D1R antagonist SCH23390 (bottom). Activity is normalized for each unit by its  
152 maximum activity. Error bars denote  $\pm 1$  SEM. **(B)** Activity from a representative cell recorded during dopamine  
153 application. This cell's activity, aligned to the first dimming event, was significantly modulated by attention,  
154 drug application and showed a significant interaction between these factors. The grey bar indicates the time  
155 window used for statistical analyses. Statistics: two-factor ANVOVA.

156 We tested whether DA application affected firing rates or rate variability, as quantified by the  
157 Fano Factors (FF) and gain variability, measured during the 500 ms preceding the first  
158 dimming, using linear mixed-effect models with categorical (effect coded) factors of drug  
159 (on/off), attention (RF/away) and unit type (narrow/broad). Confidence intervals were  
160 computed across 5000 bootstrap replicates. To control for Type I errors and to aid  
161 interpretation of model fit statistics, we additionally report the Kenward-Roger  
162 approximation for performing F tests as well as the Bayes factor (Materials & Methods). We



163 followed these analyses with tests within each unit type, depicted in Figure 3 and Figure 4.  
164 For firing rates, we found a main effect of attention ( $\beta = 2.67 \pm 0.38$ , 95% confidence interval  
165 = [1.91, 3.45],  $\chi^2_{(1)} = 29.2$ ,  $P = 6.44e^{-8}$ ,  $P_{KR} = 8.19e^{-8}$ ,  $BF = 6.65e^6$ ) reflecting the firing rate  
166 increase when attention is directed towards the RF, and a main effect of drug ( $\beta = -2.31 \pm 0.38$ ,  
167 95% confidence interval = [-3.09 -1.55],  $\chi^2_{(1)} = 31.1$ ,  $P = 2.44e^{-8}$ ,  $P_{KR} = 3.74e^{-8}$ ,  $BF = 2.06e^7$ ),  
168 indicating that DA application reduced firing rates (Figure 3C). We did not find a main effect  
169 of unit type or any interaction. For FF, we did not find any main effects of attention, drug or  
170 unit type, but we found a trending interaction effect between drug and unit type ( $\beta =$   
171  $0.18 \pm 0.10$ , 95% confidence interval = [-0.01 0.38],  $\chi^2_{(1)} = 2.97$ ,  $P = 0.084$ ,  $P_{KR} = 0.09$ ,  $BF =$   
172  $1.08$ ) and a three-way interaction between drug, attention and unit type ( $\beta = 0.22 \pm 0.10$ , 95%  
173 confidence interval = [0.03, 0.42],  $\chi^2_{(1)} = 4.75$ ,  $P = 0.029$ ,  $P_{KR} = 0.036$ ,  $BF = 3.37$ ). This  
174 interaction reflects that when attention is directed towards the RF, DA application increases  
175 FF, whereas when attention is directed away from the RF, DA application decreases FF in  
176 narrow-spiking units (Figure 3D).

177 We performed the same analyses for the application of SCH23390. For firing rates, we found  
178 a main effect of attention ( $\beta = 3.33 \pm 0.50$ , 95% confidence interval = [2.33, 4.30],  $\chi^2_{(1)} = 20.9$ ,  
179  $P = 4.92e^{-6}$ ,  $P_{KR} = 7.21e^{-6}$ ,  $BF = 3.22e^4$ ) reflecting the firing rate increase when attention is  
180 directed towards the RF, and a main effect of drug ( $\beta = -1.29 \pm 0.50$ , 95% confidence interval  
181 = [-2.3, -0.29],  $\chi^2_{(1)} = 8.47$ ,  $P = 0.004$ ,  $P_{KR} = 0.005$ ,  $BF = 13.3$ ), indicating that DA application  
182 reduced firing rates (Figure 3E). We additionally found an interaction between attention and  
183 unit type ( $\beta = 1.35 \pm 0.50$ , 95% confidence interval = [0.37, 2.33],  $\chi^2_{(1)} = 6.72$ ,  $P = 0.01$ ,  $P_{KR} =$   
184  $0.014$ ,  $BF = 4.9$ ), indicating that narrow-spiking units increased their firing rates more when  
185 attention was directed towards the RF. We did not find any effect of drug application or  
186 attention for FF, but we found a trending main effect of unit type ( $\beta = 0.85 \pm 0.42$ , 95%  
187 confidence interval = [-0.002, 1.69],  $\chi^2_{(1)} = 3.49$ ,  $P = 0.06$ ,  $P_{KR} = 0.09$ ,  $BF = 0.19$ ). However,

188 the lack of clear significant effects in conjunction with the low number of narrow-spiking  
 189 units for this sample raise doubts about their robustness (Figure 3F).

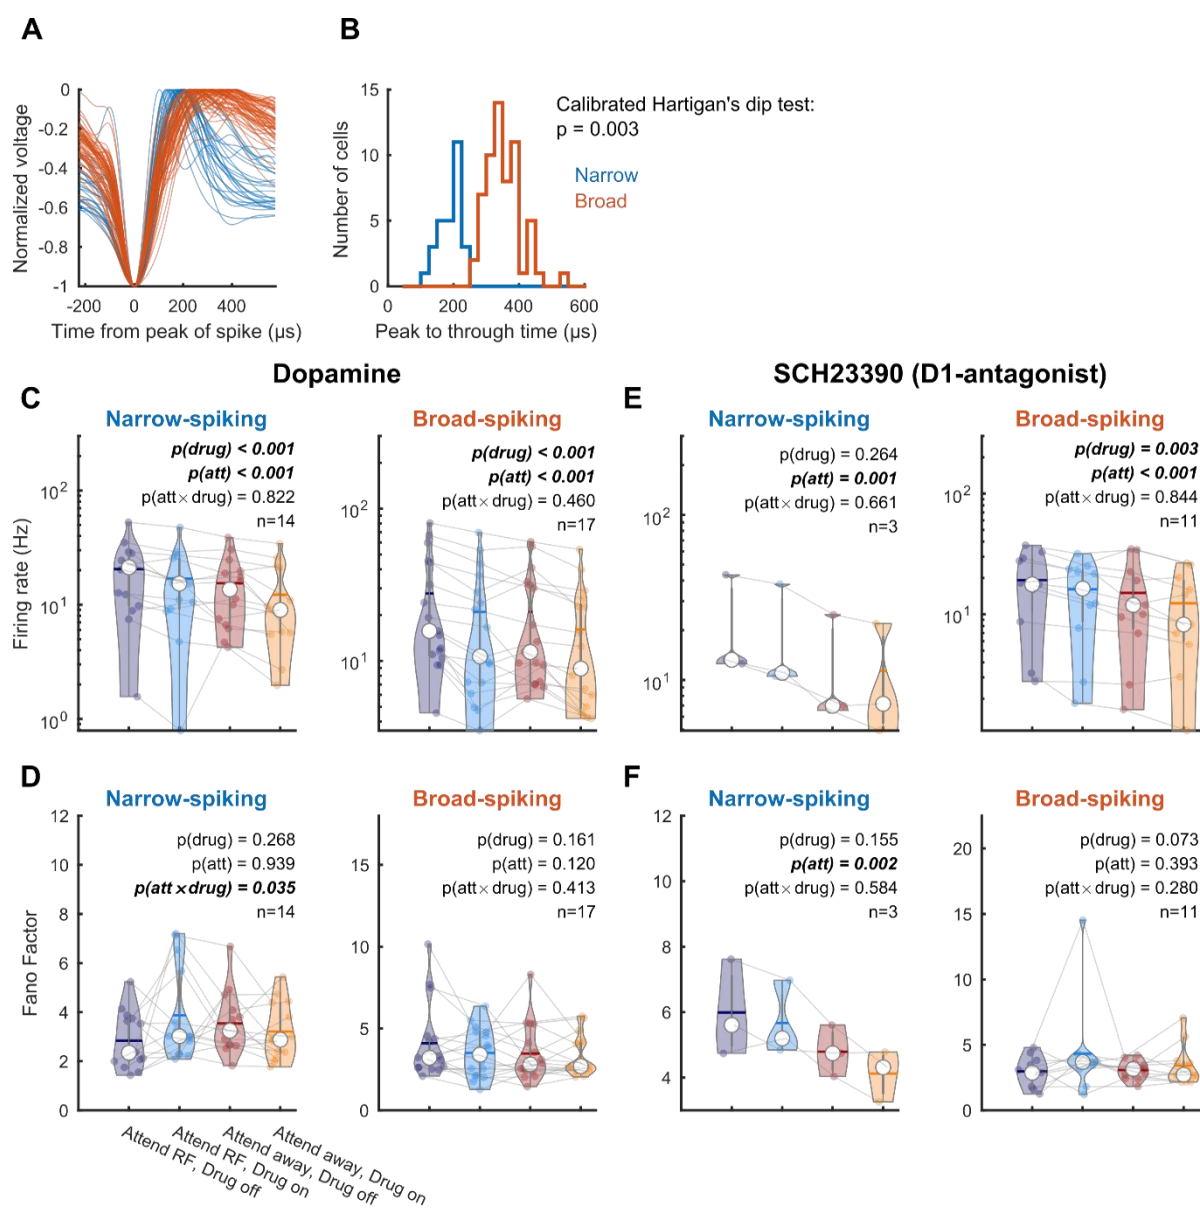

190

191 Figure 3. Dopaminergic modulation of firing rates across broad and narrow-spiking  
 192 waveforms for the population of units. **(B)** Distribution of peak-to-trough ratios. Statistics: calibrated Hartigan's  
 193 dip test (Ardid et al., 2015). **(C)** Average firing rates between attention and drug conditions for the non-specific  
 194 agonist dopamine for narrow-spiking (left) and broad-spiking (right) units. **(D)** Fano factors between attention  
 195 and drug conditions for the non-specific agonist dopamine. **(E-F)** Same conventions as **(C-D)** but for the D1R  
 196 antagonist SCH23390. Only units that revealed a main or interaction effect for the factors drug and attention  
 197 were included in this analysis. Individual markers represent the average firing rate or Fano Factor for a single

198 unit. The white marker denotes the median and the error bars the interquartile range. Horizontal bars denote the  
199 mean. Statistics: linear mixed-effect models.

200

201 We next investigated the effects of drug application and attention on gain variability (Goris et  
202 al., 2014). Neural activity often displays super-Poisson variability (larger variance than the  
203 mean), resulting from trial-to-trial changes in excitability, that can be modeled by fitting a  
204 negative binomial distribution to the spike rate histogram. This distribution is characterized  
205 by a dispersion parameter that captures this additional variability and has been proposed to  
206 reflect stimulus-independent modulatory influences on excitability (Goris et al., 2014).

207 Whereas FF is a measure of variability that is accurate when the variance is proportional to  
208 the mean, gain variability captures the nonlinear variance-to-mean relationship (Thiele et al.,  
209 2016). During DA application we found a trending main effect of attention ( $\beta = -0.1 \pm 0.041$ ,  
210 95% confidence interval =  $[-0.18, -0.02]$ ,  $\chi^2_{(1)} = 3.26$ ,  $P = 0.07$ ,  $P_{KR} = 0.07$ ,  $BF = 0.6$ ) and a  
211 main effect of drug application ( $\beta = 0.20 \pm 0.041$ , 95% confidence interval =  $[0.12, 0.28]$ ,  $\chi^2_{(1)}$   
212 = 18.5,  $P = 1.72e^{-5}$ ,  $P_{KR} = 2.33e^{-5}$ ,  $BF = 1.38e^4$ ) on gain variability. This indicates increased  
213 variability during drug application and decreased variability when attention was directed  
214 towards the RF. We furthermore found a trending interaction between attention and unit type  
215 ( $\beta = -0.07 \pm 0.041$ , 95% confidence interval =  $[-0.15, 0.01]$ ,  $\chi^2_{(1)} = 2.72$ ,  $P = 0.099$ ,  $P_{KR} = 0.11$ ,  
216  $BF = 0.65$ ), revealing a decrease in gain variability in narrow-spiking units when attention  
217 was directed towards the RF (Figure 4A). For SCH23390, we found a trending main effect of  
218 attention ( $\beta = -0.14 \pm 0.081$ , 95% confidence interval =  $[-0.3, 0.02]$ ,  $\chi^2_{(1)} = 3.52$ ,  $P = 0.061$ ,  $P_{KR}$   
219 = 0.065,  $BF = 1.08$ ) and a main effect of drug application ( $\beta = 0.16 \pm 0.081$ , 95% confidence  
220 interval =  $[0.0004, 0.32]$ ,  $\chi^2_{(1)} = 9.04$ ,  $P = 0.003$ ,  $P_{KR} = 0.004$ ,  $BF = 37$ ), indicating increased  
221 gain variability with drug application and decreased variability when attention was directed  
222 towards the RF. In addition, there was as a trending interaction effect between drug

223 application and unit type ( $\beta = 0.16 \pm 0.081$ , 95% confidence interval =  $[-0.31, 0.001]$ ,  $\chi^2_{(1)} =$   
 224 3.56,  $P = 0.059$ ,  $P_{KR} = 0.08$ ,  $BF = 1.33$ ), indicating a relatively larger difference in gain  
 225 variability in broad compared to narrow-spiking units. The model fits within each unit type  
 226 revealed a significant main effect of drug application ( $\beta = 0.31 \pm 0.088$ ,  $p = 0.0009$ ) and an  
 227 interaction between drug application and attention ( $\beta = 0.18 \pm 0.088$ ,  $p = 0.048$ ) for broad-  
 228 spiking units. For narrow-spiking units we found a main effect of attention ( $\beta = -0.14 \pm 0.03$ ,  $p$   
 229  $= 0.001$ ) and a trending interaction effect between drug application and attention ( $\beta = 0.06$   
 230  $\pm 0.03$ ,  $p = 0.071$ ) (Figure 4B).

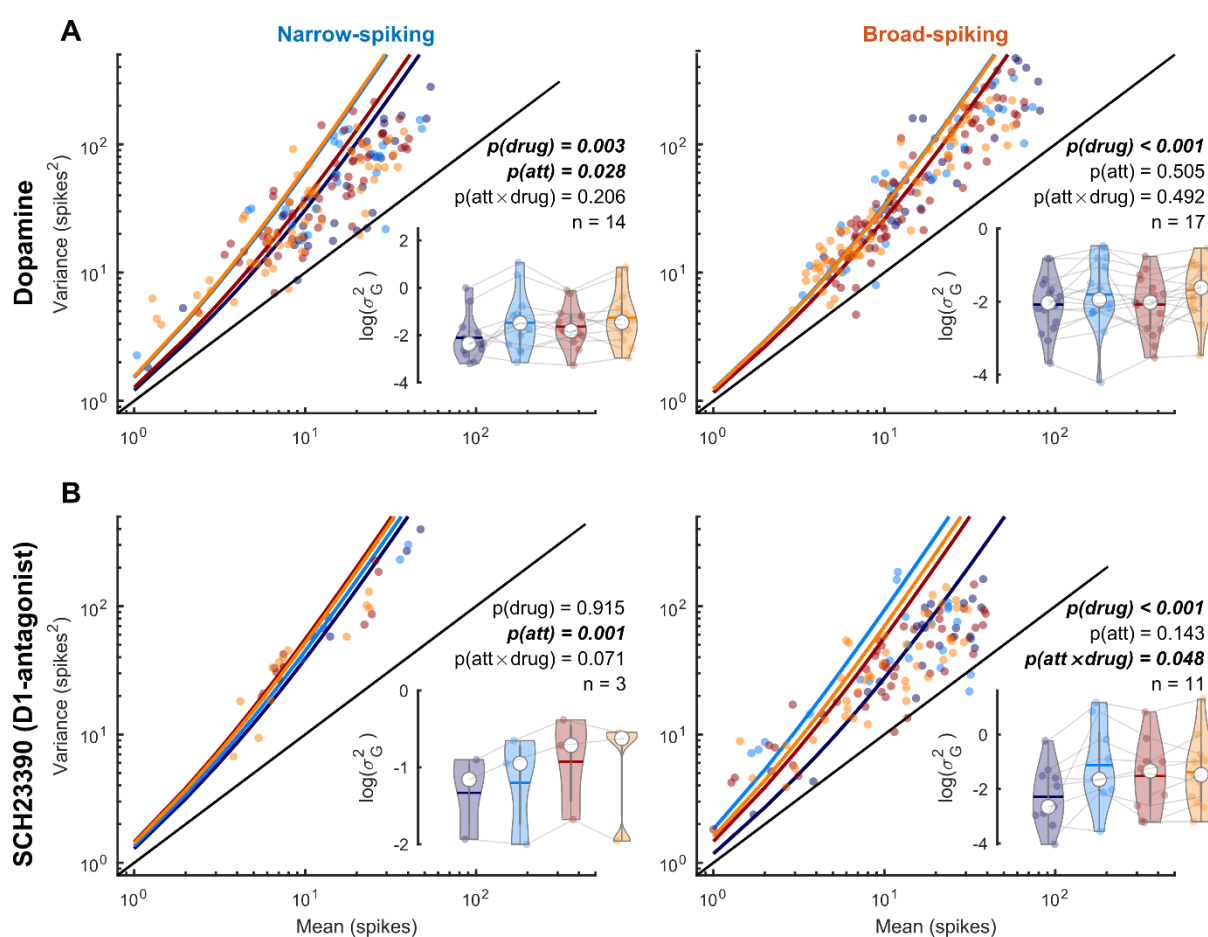

231

232 Figure 4. Dopaminergic modulation of gain variability across broad and narrow-spiking units. (A) Variance-to-  
 233 mean relationship across attention and drug conditions for narrow-spiking (left) and broad-spiking (right) units  
 234 for the non-specific agonist dopamine. Individual dots depict the variance and mean across trials for a single  
 235 condition. Solid lines show the predicted mean-to-variance relationship given the average fitted dispersion

236 parameter ( $\sigma_G^2$ ). Insets show  $\sigma_G^2$  for each unit and their comparison across attention and drug conditions.  
237 Individual markers represent the gain variability for a single unit. The white marker denotes the median and the  
238 error bars the interquartile range. Horizontal bars denote the mean. **(B)** Same conventions as **(A)** but for the DIR  
239 antagonist SCH23390. Only units that revealed a main or interaction effect for the factors drug were included in  
240 this analysis. Statistics: linear mixed-effect models.

241  
242 To investigate whether DA affected attention-specific activity, we tested if attention AUROC  
243 values were modulated by drug application. Attention AUROC values indicate how well an  
244 ideal observer can distinguish between neural activity during attend RF or attend away trials.  
245 A value of 0.5 indicates that the distributions are indistinguishable, whereas values of 0 or 1  
246 indicate perfectly distinguishable distributions. Drug application reduced AUROC values for  
247 broad-spiking cells, whereas narrow-spiking cells were unaffected (Figure 5A) [two-sided  
248 Wilcoxon signed-rank test; narrow-spiking:  $\Delta$ -AUROC  $-0.002 \pm 0.01$ ,  $p=0.952$ , Cohen's  
249  $d=0.030$ ; broad-spiking:  $\Delta$ -AUROC  $-0.034 \pm 0.006$ ,  $p=0.009$ , Cohen's  $d=-0.70$ ]. Corrected  
250 AUROC values (1-AUROC if the AUROC value was smaller than 0.5 without drug  
251 application, Materials & Methods) revealed a trending relationship [two-sided Wilcoxon  
252 signed-rank test; broad-spiking:  $\Delta$ -AUROC  $-0.02 \pm 0.01$ ,  $p=0.08$ , Cohen's  $d=-0.38$ ].  
253 SCH23390 application did not modulate AUROC values for either cell type (Figure 5B). DA  
254 thus had a cell-type specific effect on attentional rate modulation, but this was only trending,  
255 once corrected values of AUROCs were used.

256 We applied dopaminergic drugs with a variety of iontophoretic ejection currents (20-90 nA).  
257 Since DA has previously been shown to modulate neural activity according to an inverted U-  
258 shaped dose-response curve (Vijayraghavan et al., 2007), with maximal modulation at  
259 intermediate DA levels, we tested whether the ejection current was predictive of the firing  
260 rate modulation associated with drug application, estimated by a drug modulation index

261 (MI<sub>drug</sub>, Materials & Methods). Specifically, we used sequential linear mixed-effect model  
262 analyses and likelihood ratio tests to test for linear and quadratic trends. U-shaped trends  
263 were verified using the two-lines approach (Materials & Methods). DA displayed a non-  
264 monotonic relationship with MI<sub>drug</sub> ( $\chi^2_{(1)} = 9.89$ ,  $p = 0.002$ ) and revealed an inverted U-  
265 shaped curve ( $p < 0.05$ ) in which intermediate ejection currents elicited the most negative  
266 MI<sub>drug</sub>, i.e. the largest inhibition of activity (Figure 5C). For SCH23390, on the other hand,  
267 we found a monotonic dose-response relationship ( $\chi^2_{(1)} = 4.31$ ,  $p = 0.038$ ), with more  
268 inhibition of firing rates with higher drug ejection currents (Figure 5D). Neither of these  
269 dose-response relationships were dependent on unit sub-selection based on their attention or  
270 drug selectivity (Supplementary figure 3).

271 To investigate whether drug dosage was also predictive of attentional rate modulation, we  
272 performed the same analysis on the difference score (drug – no drug) of attention AUROC  
273 values. Neither DA ( $\chi^2_{(1)} = 0.95$ ,  $p = 0.330$ ), nor SCH23390 ( $\chi^2_{(1)} = 0.33$ ,  $p = 0.568$ ) dosage  
274 were predictive of attention AUROC, regardless of unit sub-selection (Supplementary figure  
275 4).

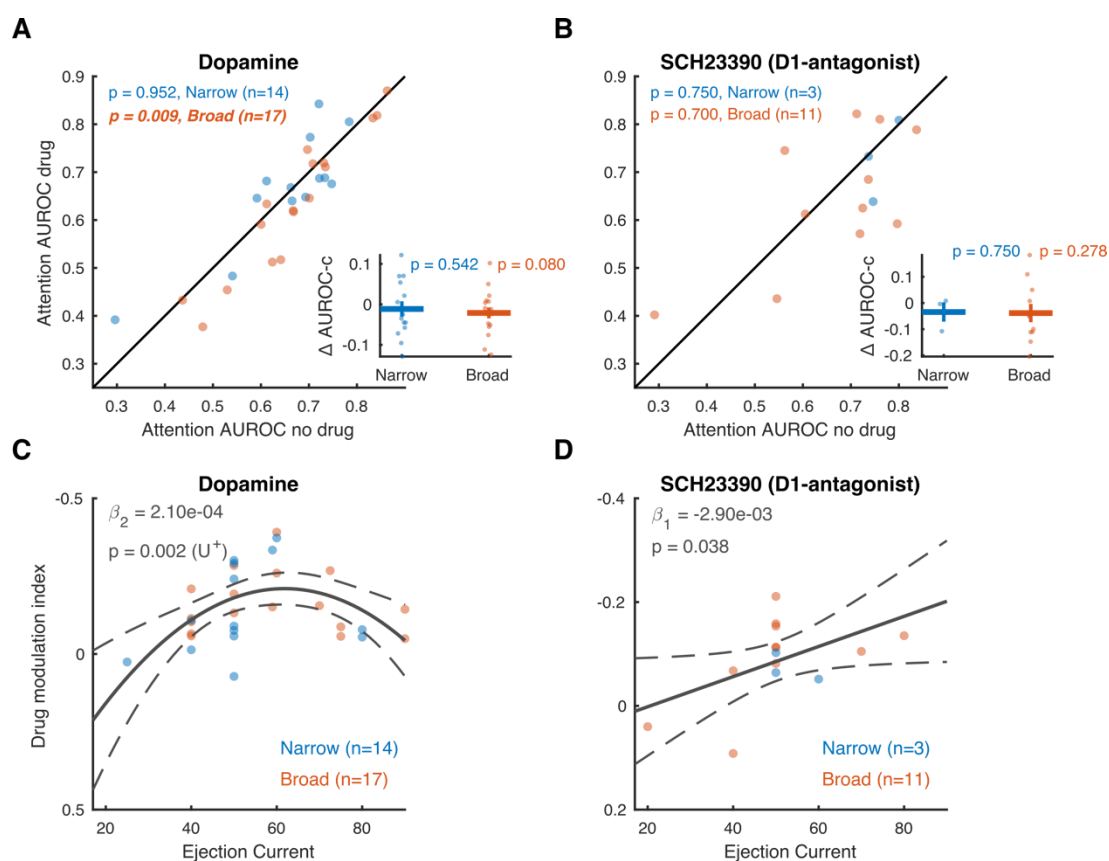

276

277 Figure 5. Dopaminergic modulation of AUROC values and dose-response curves. (A-B) Area under the receiver  
 278 operating characteristic (AUROC) curve between no drug and drug conditions for the non-specific agonist  
 279 dopamine (A) and the D1R antagonist SCH23390 (B). The insets depict the difference (drug-no drug) of the  
 280 corrected AUROC values (Materials & Methods). Only cells that revealed a main or interaction effect for the  
 281 factors of drug and attention were included in this analysis. Statistics: Wilcoxon signed rank tests (FDR  
 282 corrected). Statistics deemed significant after multiple comparison correction are displayed in italic and boldface  
 283 fonts. (C-D) Drug modulation index plotted against ejection current for the non-specific agonist dopamine (C)  
 284 and the D1R antagonist SCH23390 (D). Note the reversed y-axis. Solid and dotted lines represent significant  
 285 model fits (applied to all cells simultaneously) and their 95% confidence intervals, respectively. A monotonic  
 286 relationship is shown if a first-order fit was better than a constant fit, and a non-monotonic relationship is shown  
 287 if a second-order fit was better than a linear fit.  $U^+$  indicates a significant U-shaped relationship. Only cells that  
 288 revealed a main or interaction effect for the factor drug were included in this analysis. Statistics: linear mixed-  
 289 effects model analysis.

290



291 Interestingly, we found that the application of both DA and SCH23390 influenced pupil  
292 diameter. We conducted a sliding-window Wilcoxon signed rank test analysis for each 200  
293 ms window, in 10 ms increments, comparing baseline-normalized pupil diameter on drug  
294 compared to no-drug trials (Figure 6A). This analysis revealed a significant difference in  
295 pupil diameter that started after stimulus onset and lasted until after cue onset. Specifically,  
296 we found a small but significant modulation of the pupillary light reflex (Figure 6). The  
297 magnitude of the constriction of the pupil upon stimulus onset was reduced during  
298 dopaminergic drug application compared to control trials [two-sided Wilcoxon signed-rank  
299 test; DA:  $\Delta$ -pupil  $0.10 \pm 0.02$ ,  $p < 0.001$ , Cohen's  $d = 1.09$ ; SCH23390:  $\Delta$ -pupil  $0.10 \pm 0.03$ ,  
300  $p = 0.004$ , Cohen's  $d = 0.79$ ], but neither drug influenced pupil diameter during any other time  
301 window (Figure 6B-E). Another sliding window analysis using a two factor (drug by  
302 attention) repeated measures ANOVA revealed no effect of attention (main or interaction) on  
303 pupil diameter (data not shown). Thus, locally applied dopaminergic drugs in parietal cortex  
304 modulated the pupillary light reflex upon stimulus onset.

305



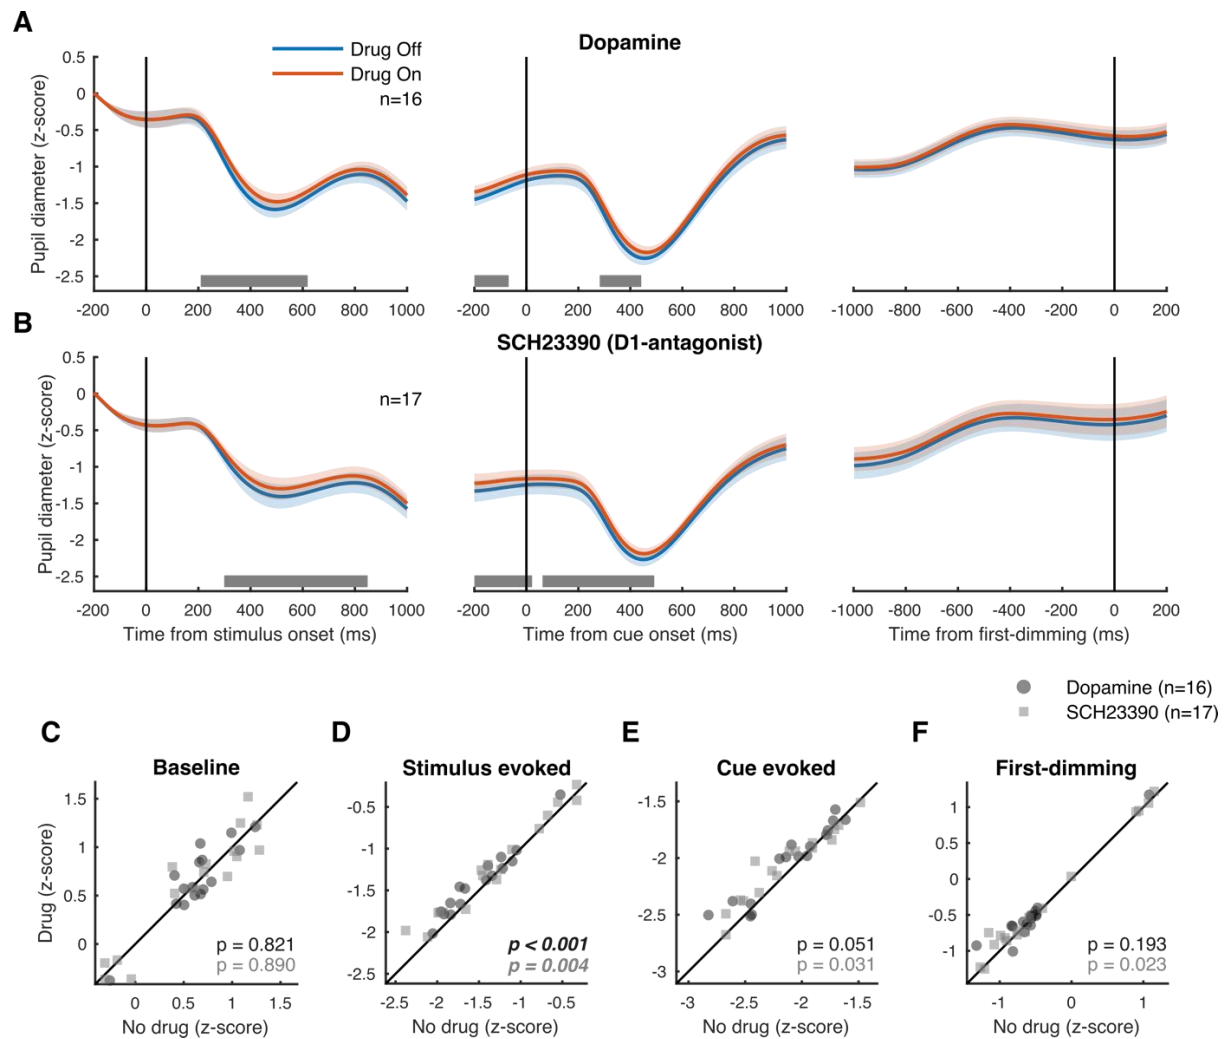

306

307 Figure 6. Modulation of pupil diameter by dopamine in Parietal cortex. (A) Pupil diameter during sessions  
 308 where dopamine was administered aligned to stimulus onset (left), cue onset (middle) and the first dimming  
 309 event (right). The grey bar indicates the times where drug application brought about a significant difference in  
 310 pupil diameter. (B) As (A) but for sessions where D1R antagonist SCH23390 was applied. (C-F) Average pupil  
 311 diameter during pre-stimulus baseline period (C), after stimulus onset (D), after cue onset (E), and before the  
 312 first dimming event (F). Shaded regions denote  $\pm 1$  SEM. Statistics: Wilcoxon signed rank test (FDR corrected).  
 313 Statistics deemed significant after multiple comparison correction are displayed in italic and boldface fonts.

314

## 315 Discussion

316 We tested the effects of dopaminergic drugs on PPC activity during spatial selective  
 317 attention. The non-specific agonist DA inhibited activity according to an inverted U-shaped

318 dose-response curve, whereas the D1R antagonist SCH23390 decreased firing rates for  
319 broad-spiking units following a monotonic dose-response curve. We found interaction effects  
320 between DA application and attention for Fano Factors in narrow-spiking units, as well as  
321 application of SCH23390 and gain variability in broad-spiking units. We further found  
322 preliminary evidence that DA reduces attention-related firing rate modulations in broad-  
323 spiking units. Finally, we found that local drug application in parietal cortex decreased the  
324 pupillary light reflex. This is the first study (to the best of our knowledge) revealing the role  
325 of dopaminergic modulation on task-related activity in the parietal cortex of the rhesus  
326 macaque.

327

### 328 [General and cell-type specific dopaminergic modulation in parietal cortex](#)

329 We distinguished between broad and narrow-spiking units. Even though, as discussed above,  
330 this classification does not reflect a one-to-one mapping onto interneurons and pyramidal  
331 cells, this categorization may explain some of our results (Jacob et al., 2016, 2013). DA has a  
332 well-established role in modulating prefrontal signaling, supporting cognitive functions such  
333 as working memory and attention (Clark and Noudoost, 2014; Noudoost and Moore, 2011b;  
334 Ott and Nieder, 2019; Thiele and Bellgrove, 2018; Vijayraghavan et al., 2007; Watanabe et  
335 al., 1997; Williams and Goldman-Rakic, 1995). D1R and D2R are expressed broadly  
336 throughout the cortex and fulfil complementary roles in prefrontal cognitive control (Ott and  
337 Nieder, 2019). Although D2Rs have been implicated in rule coding (Ott et al., 2014),  
338 modulation of working memory is mostly associated with D1R stimulation or blockade  
339 (Sawaguchi et al., 1990; Sawaguchi and Goldman-Rakic, 1991, 1994; Williams and  
340 Goldman-Rakic, 1995). Moreover, while manipulation of either receptor subtype in FEF can  
341 modulate behavioral choices (Soltani et al., 2013), only D1R blockade in FEF elicits activity  
342 resembling attentional effects in extrastriate visual areas (Noudoost and Moore, 2011a).

|

343 Interestingly, D1R expression is higher in FEF pyramidal cells compared to interneurons  
344 (Mueller et al., 2019, 2018). Here, the effects of dopaminergic drugs were greater for broad-,  
345 rather than narrow-spiking units. Although it is unknown whether DA receptor expression  
346 differs across cell types in PPC, if expression is similar to the FEF, modulation of parietal  
347 attentional signals might rely on higher expression of D1R compared to D2R in broad-  
348 spiking putative pyramidal cells.

349 It is remarkable that the majority of the recorded neurons were inhibited by DA and  
350 SCH23390 application, as previous studies (in prefrontal cortex) found mixed responses to  
351 unselective DA (Jacob et al., 2013) or D1R stimulation (Vijayraghavan et al., 2007; Williams  
352 and Goldman-Rakic, 1995). As control recordings using saline did not result in any  
353 systematic effects (Supplementary figure 2), these effects were not due to our  
354 recording/iontophoresis methods.

355 The effects found may alternatively be explained by drug dosages. Although Jacob et al.  
356 (2013) found that the proportion of inhibited and excited cells did not differ across a variety  
357 of ejection currents (25-100 nA), activity increases have been found for low, and decreases  
358 for high D1R agonist and antagonist dosages (Vijayraghavan et al., 2007; Williams and  
359 Goldman-Rakic, 1995). Indeed, while our sample size using lower dosages was small, lower  
360 ejection currents predicted positive and less negative modulation. At the dosages used in this  
361 study, DA could have mostly inhibitory effects. Vijayraghavan et al. (2007) found that low  
362 doses (10-20 nA) of D1R agonists reduced overall firing rates, but increased spatial  
363 specificity of prefrontal neurons, whereas high dosages (20-100 nA) further reduced activity  
364 and abolished spatially selective information. Given that our study was unrelated to spatial  
365 specificity (i.e. saccade field tuning), we were unable to assess this particular feature, but  
366 dopaminergic influences may still enhance spatial tuning of PPC despite an overall reduction  
367 in activity.

368 Another factor that could explain the low number of DA-excited units is the short block  
369 duration used in our task. Cells excited by DA respond more slowly to drug application than  
370 inhibited cells, with an average modulation up-ramp time constant of 221.9 s (Jacob et al.,  
371 2013). In our task, with a median trial duration of approximately 8 s, a block (36 trials) lasted  
372 approximately 288 s. DA-excited neurons could have only started to show modulation  
373 towards the end of the block, resulting in a population of largely inhibited units.

374 In sum, dopaminergic effects on (task-related) activity are complex (Seamans and Yang,  
375 2004) and depend on various factors not controlled for in this study, such as endogenous  
376 levels of DA. Within prefrontal cortex, coding can be enhanced by D1R agonists, and  
377 diminished by antagonists (Ott et al., 2014; Vijayraghavan et al., 2007), or vice-versa  
378 (Noudoost and Moore, 2011a; Williams and Goldman-Rakic, 1995). Indeed, dopaminergic  
379 effects show regional variability across different brain areas, even within PFC (Arnsten et al.,  
380 2012). Thus, the mechanisms discussed above might not apply to PPC. Finally, as SCH23390  
381 also has high affinity agonistic properties for 5-HT<sub>2c</sub> (serotonin) receptors (Millan et al.,  
382 2001), some of our effects might be unrelated to dopaminergic functioning. Although the  
383 effects on attention were modest and our sample size was relatively small, these results  
384 encourage future studies with larger sample sizes and a more detailed distinction between cell  
385 types to explore cell-type and receptor-subtype specific (dose-dependent) effects of DA in  
386 parietal cortex during task performance.

387

### 388 [Dopaminergic dose-response curve](#)

389 DA receptor stimulation follows an inverted-U shaped dose-response curve whereby too little  
390 or too much stimulation leads to suboptimal behavioral performance (Arnsten et al., 1994;  
391 Zahrt et al., 1997) or neural coding (Vijayraghavan et al., 2007). Whereas optimal levels of

392 DA receptor stimulation can stabilize and tune neural activity, suboptimal levels decrease  
393 neural coding and behavioral performance.

394 Here we found an inverted-U shaped dose-response curve for DA, and a monotonic function  
395 for SCH23390. Rather than predicting neural coding for attention, however, ejection currents  
396 were merely predictive of drug modulation indices, without any relationship to attention  
397 AUROC values. However, these results should be interpreted with caution. First, our sample  
398 size, especially for SCH23390, might have been too small to reliably determine the shape of  
399 the dose-response curve. Second, since lower and higher ejection currents were not used as  
400 often as intermediate currents, it is possible we did not have sufficient data to constrain the  
401 function fit at the extremes. Finally, we applied different ejection currents across rather than  
402 within cells. Based on these data, it is therefore not possible to conclusively state that  
403 individual cells in parietal cortex respond according to a U-shaped dose response curve. It is  
404 furthermore important to note that the dopaminergic effects might partly be driven by  
405 receptor subtypes (e.g. D2R) not usually associated with modulation of delay period activity.  
406 Despite these notes of caution, we believe this study provides evidence for a role of DA in  
407 parietal cortex during cognitive tasks and presents opportunities for future research to  
408 elucidate the exact underlying mechanisms.

409

#### 410 Dopaminergic modulation of the pupil light reflex

411 The pupil light reflex (PLR) transiently constricts the pupil after exposure to increases in  
412 illumination or presentation of bright stimuli (Loewenfeld, 1993; McDougal and Gamlin,  
413 2014). Recent studies have shown that covert attention can modulate this behavioral reflex  
414 (Binda and Murray, 2015a, 2015b; Naber et al., 2013). Subthreshold FEF microstimulation  
415 respectively enhances or reduces the PLR when a light stimulus is presented inside or outside

416 the saccade field (Ebitz and Moore, 2017). The PLR thus depends both on luminance changes  
417 and the location of spatial attention. We found that dopaminergic drug application in parietal  
418 cortex reduced the PLR. These results are in agreement with the electrophysiological results,  
419 as drug administration also reduced attentional rate modulation. Two (non-exclusive)  
420 mechanisms have been proposed by which FEF can modulate the PLR (Binda and Gamlin,  
421 2017); by direct or indirect projections to the olivary pretectal nucleus, or via indirect  
422 projections to constrictor neurons in the Edinger-Westphal nucleus. For the latter, these  
423 projections are hypothesized to pass through extrastriate visual cortex and/or the superior  
424 colliculus (SC). Subthreshold microstimulation of the intermediate (SCi), but not superficial  
425 (SCs), layers of the SC elicits a short latency pupillary dilation (Joshi et al., 2016; Wang et  
426 al., 2012). Whereas the SCs receive input from early visual areas, including the retina, the  
427 SCi receives input from higher-order association cortices. Along with preparing and  
428 executing eye movements, the SCi is involved in directing covert attention (Ignashchenkova  
429 et al., 2004; Kustov and Lee Robinson, 1996; Lovejoy and Krauzlis, 2010; Muller et al.,  
430 2005), and provides an essential contribution to the selection of stimuli amongst competing  
431 distractors (McPeck and Keller, 2004, 2002; reviewed in Mysore and Knudsen, 2011).  
432 Moreover, the SC receives dense projections from parietal cortex (Becker, 1989; Kuypers  
433 and Lawrence, 1967), and has been hypothesized to play an important role in pupil diameter  
434 modulation (Wang and Munoz, 2015). It is currently unclear whether dopaminergic  
435 modulation of frontal (or parietal) cortex modulates SC activity, but this pathway seems a  
436 strong candidate for the modulation of the PLR (Wang and Munoz, 2015) that we  
437 encountered in this study through DA application. Here, dopaminergic drug application  
438 reduced parietal activity and brought about a gain modulation (reduction) of a brainstem-  
439 mediated reflex to fixed visual input. Although covert attention was not directed at any  
440 specific stimulus at the time of stimulus onset, the modulation of the PLR observed here is

441 consistent with previously reported effects of covert attention and FEF microstimulation on  
442 the PLR. Speculatively, this modulation could affect the bottom-up attentional capture by the  
443 stimulus, but further studies are required to test this hypothesis.

444

## 445 Conclusion

446 DA is an important modulator of high-level cognitive functions, both in the healthy and  
447 ageing brain as well as for various clinical disorders (Arnsten et al., 2012; Robbins and  
448 Arnsten, 2009; Thiele and Bellgrove, 2018). Although dopaminergic effects within PFC have  
449 been elucidated in some detail, the effects of DA in other brain areas such as parietal cortex,  
450 despite its well-established role in cognition and cognitive dysfunction, has largely been  
451 overlooked. This study is the first to show dopaminergic modulation of parietal activity in  
452 general, and activity specific to spatial attention in the non-human primate. Our work  
453 encourages future studies of dopaminergic involvement in parietal cortex, thereby gaining a  
454 broader understanding of neuromodulation in different networks for cognition.

455

## 456 Materials & Methods

### 457 Procedures

458 All animal procedures were approved by the Newcastle University Animal Welfare Ethical  
459 Review Board and performed in accordance with the European Communities Council  
460 Directive RL 2010/63/EC, the National Institute of Health's Guidelines for the Care and Use  
461 of Animals for Experimental Procedures, and the UK Animals Scientific Procedures Act.  
462 Animals were motivated to engage in the task through fluid control at levels that do not affect  
463 animal physiology and have minimal impact on psychological wellbeing (Gray et al., 2016).

|

464

## 465 [Surgical preparation](#)

466 The monkeys were implanted with a head post and recording chambers over the lateral  
467 intraparietal sulcus under sterile conditions and under general anesthesia. Surgery and  
468 postoperative care conditions have been described in detail previously (Thiele et al., 2006).

469

## 470 [Behavioral paradigms](#)

471 Stimulus presentation and behavioral control was regulated by Remote Cortex 5.95  
472 (Laboratory of Neuropsychology, National Institute for Mental Health, Bethesda, MD).

473 Stimuli were presented on a cathode ray tube (CRT) monitor at 120 Hz, 1280 × 1024 pixels,  
474 at a distance of 54 cm.

475 The location of the saccade field (SF) was mapped using a visually- or memory-guided  
476 saccade task. Here, monkeys fixated centrally for 400 ms after which a saccade target was  
477 presented in one of nine possible locations (8-10° from fixation, distributed equidistantly).  
478 After a random delay (800-1400 ms, uniformly distributed) the fixation point was  
479 extinguished, which indicated to the monkey to perform a saccade towards the target. In the  
480 memory-guided version of the task (used only for saline-control recordings), the visual target  
481 was briefly presented in one of four locations. After extinguishing the target, its location  
482 needed to be remembered until a saccade was made towards the remembered location (after  
483 extinguishing of the fixation point). Online analysis of visual, sustained and saccade related  
484 activity determined an approximate SF location which guided our subsequent receptive field  
485 (RF) mapping. The location and size of RFs were measured as described previously  
486 (Gieselmann and Thiele, 2008), using a reverse correlation method. Briefly, during fixation, a  
487 series of black squares (1-3° size, 100% contrast) were presented for 100 ms at



488 pseudorandom locations on a  $9 \times 12$  grid (5-25 repetitions for each location) on a bright  
489 background. RF eccentricity ranged from  $2.5^\circ$  to  $17^\circ$  and were largely confined to the  
490 contralateral visual field.

491 The main task and stimuli have been described previously (Ferro et al., 2021; Thiele et al.,  
492 2016; van Kempen et al., 2021). In brief, the monkey initiated a trial by holding a lever and  
493 fixating a white fixation spot ( $0.1^\circ$ ) displayed on a grey background ( $1.41 \text{ cd/m}^2$ ). After  
494 425/674 ms [monkey 1/monkey 2] three colored square wave gratings ( $2^\circ$  -  $6^\circ$ , dependent on  
495 RF size and distance from fixation) appeared equidistant from the fixation spot, one of which  
496 was centered on the RF of the recorded neuron. Red, green and blue gratings (see Table 1 for  
497 color values) were presented with an orientation at a random angle to the vertical meridian  
498 (the same orientation for the three gratings in any given session). The locations of the colors,  
499 as well as the orientation, were pseudorandomly assigned between recording sessions and  
500 held constant for a given recording session. Gratings moved perpendicular to the orientation,  
501 whereby the direction of motion was pseudorandomly assigned for every trial. After a  
502 random delay (570-830/620-940 ms [monkey 1/monkey 2], uniformly distributed in 1 ms  
503 steps) a central cue appeared that matched the color of the grating that would be relevant on  
504 the current trial. After 980-1780/1160-1780 ms [monkey 1/monkey 2] (uniformly distributed  
505 in 1 ms steps), one pseudorandomly selected grating changed luminance (dimmed). If the  
506 cued grating dimmed, the monkey had to release the lever to obtain a reward. If a non-cued  
507 grating dimmed, the monkey had to ignore this and wait for the cued grating to dim. This  
508 could happen when the second or third grating changed luminance (each after 750-1130/800-  
509 1130 ms [monkey 1/monkey 2], uniformly distributed in 1 ms steps). Drugs were  
510 administered in blocks of 36 trials. The first block was always a control block. Thereafter,  
511 drug blocks and recovery blocks were alternated until the animal stopped working (number of  
512 block reversals, median  $\pm$  interquartile range =  $12 \pm 6$ ).

513

514 Table 1. Color values used for the 3 colored gratings across recording sessions and subjects, indicated as [RGB]

515 – luminance (cd/m<sup>2</sup>). a = Undimmed values, b = dimmed values.

|                                       | <i>Red</i>          | <i>Green</i>        | <i>Blue</i>           |
|---------------------------------------|---------------------|---------------------|-----------------------|
| <b><i>Monkey 1</i></b>                | a. [255 0 0] - 14.5 | a. [0 128 0] – 9.1  | a. [60 60 255] - 11.5 |
| <b><i>Early recordings (n=29)</i></b> | b. [100 0 0] - 1.4  | b. [0 70 0] – 1.9   | b. [10 10 140] – 2.2  |
| <b><i>Monkey 2</i></b>                | a. [220 0 0] – 12.8 | a. [0 135 0] – 12.9 | a. [60 60 255] – 12.2 |
| <b><i>Early recordings (n=5)</i></b>  | b. [180 0 0] – 7.7  | b. [0 110 0] – 7.3  | b. [35 35 220] – 7.4  |
| <b><i>Monkey 1/2 (n=12/8)</i></b>     | a. [220 0 0] – 12.8 | a. [0 135 0] – 12.9 | a. [60 60 255] – 12.2 |
| <b><i>Late recordings</i></b>         | b. [140 0 0] – 4.2  | b. [0 90 0] – 4.6   | b. [30 30 180] – 4.6  |

516

517

### 518 Identification of recording sites

519 The location of the IPS was initially guided by means of postoperative structural magnetic

520 resonance imaging (MRI), displaying the recording chamber. During each recording,

521 neuronal response properties were determined using SF and RF mapping tasks. During the SF

522 mapping task, we targeted cells that showed spatially selective persistent activity and

523 preparatory activity before the execution of a saccadic eye movement.

524

### 525 Electrode-pipette manufacturing

526 We recorded from the lateral (and in a few occasions medial) bank of the IPS using custom-

527 made electrode-pipettes that allowed for simultaneous iontophoretic drug application and

528 extracellular recording of spiking activity (Thiele et al., 2006). The location of the recording

529 sites in one of the monkeys was verified in histological sections stained for cyto- and  
530 myeloarchitecture (Distler and Hoffmann, 2001).

531 The manufacture of the electrodes was similar to the procedures described by Thiele et al.,  
532 (2006), with minor changes to the design in order to reach areas deeper into the IPS, such as  
533 the ventral part of the lateral intraparietal area (LIPv). We sharpened tungsten wires (125  $\mu$ m  
534 diameter, 75 mm length, Advent Research Materials Ltd., UK) by electrolytic etching of the  
535 tip (10-12 mm) in a solution of NaNO<sub>2</sub> (172.5 g), KOH (85 g) and distilled water (375 ml).  
536 We used borosilicate glass capillaries with three barrels (custom ordered, Hilgenberg GmbH,  
537 [www.hilgenberg-gmbh.de](http://www.hilgenberg-gmbh.de)), with the same dimensions as those described previously (Thiele  
538 et al., 2006). The sharpened tungsten wire was placed in the central capillary and secured in  
539 place by bending the non-sharpened end (approximately 10 mm) of the wire over the end of  
540 the barrel. After marking the location of the tip of the tungsten wire, shrink tubing was placed  
541 around the top and bottom of the glass. The glass was pulled around the tungsten wire using a  
542 PE-21 Narishige microelectrode puller with a heating coil made from Kanthal wire (1 mm  
543 diameter, 13 loops, inner loop diameter 3 mm) and the main (sub) magnet set to 30 (0) and  
544 the heater at 100. The electrode-pipette was placed such that the tip of the tungsten wire  
545 protruded 11 mm from the bottom of the heating coil. After pulling, we filled the central  
546 barrel (with the tungsten electrode inside) with superglue using a syringe and fine flexible  
547 injection cannula (MicroFil 28 AWG, MF28G67-5, World Precision Instruments, Ltd.). We  
548 found that if we did not fill (most of) the central barrel with superglue after pulling, the  
549 recorded signal was often very noisy, possibly due to small movements of the animal (such as  
550 drinking), which caused the free tungsten wire to resonate inside the glass. Using a micro  
551 grinder (Narishige EG-400), we removed excess glass, sharpened the tip of the electrode and  
552 opened the flanking barrels of the pipette. This pulling procedure resulted in a pulled

553 electrode part of approximately 2.5 cm length, with gradually increasing diameter, from ~10  
554  $\mu\text{m}$  to ~200  $\mu\text{m}$ , over the first 12 mm of the electrode-pipette.

555

#### 556 [Electrode-pipette filling and iontophoresis](#)

557 Electrode-pipettes were back-filled with the same drug in both pipettes using a syringe, filter  
558 units (Millex® GV, 22  $\mu\text{m}$  pore diameter, Millipore Corporation) and fine flexible injection  
559 cannula (MicroFil 34 AWG, MF34G-5, World Precision Instruments, Ltd.). The pipettes  
560 were connected to the iontophoresis unit (Neurophore-BH- 2, Medical systems USA) with  
561 tungsten wires (125  $\mu\text{m}$  diameter) inserted into the flanking barrels. Because of the  
562 exploratory nature of these recordings (it is unknown whether DA influences parietal neurons  
563 during spatial attention tasks and what modulation can be expected with different amounts of  
564 drug applied), we used a variety of iontophoretic ejection currents (20 - 90 nA). The choice  
565 of current was not based on the characteristics of individual cells (e.g. their responsiveness to  
566 the drug). A fixed ejection current of 50 nA was used for the saline-control recordings. The  
567 details regarding concentration and pH of the drugs were: DA (0.1M in water for injections,  
568 pH 4-5), SCH23390 (0.005-0.1M in water for injections, pH 4-5) and saline with  
569 citrate/hydrochloric acid buffer solution (pH 4). We excluded the first two trials after a block  
570 change to allow the drugs to wash in/out and avoid sudden rate changes.

571

#### 572 [Data acquisition](#)

573 Stimulus presentation, behavioral control and drug administration was regulated by Remote  
574 Cortex 5.95 (Laboratory of Neuropsychology, National Institute for Mental Health, Bethesda,  
575 MD). Raw data were collected using Remote Cortex 5.95 (1-kHz sampling rate) and by  
576 Cheetah data acquisition (32.7-kHz sampling rate, 24-bit sampling resolution) interlinked

577 with Remote Cortex 5.95. Data were replayed offline, sampled with 16-bit resolution and  
578 band-pass filtered (0.6-9 kHz). Spikes were sorted manually using SpikeSort3D (Neuralynx).  
579 Eye position and pupil diameter were recorded using a ViewPoint eyetracker (Arrington  
580 research) at 220 Hz. Pupil diameter was recorded in 33 out of 47 recording sessions.

581

## 582 Pupillometry

583 Pupil diameter was low pass filtered (10 Hz) using a second order Butterworth filter. Baseline  
584 activity, estimated as the average activity before stimulus onset (-300 to -50 ms), was  
585 subtracted from the pupil diameter time course on a trial-by-trial basis. Next, we z-score  
586 normalized the pupil diameter data for each session. Pupil diameter was averaged in 250 ms  
587 windows around 500 ms following stimulus onset, 500 ms following cue onset and between  
588 300 to 50 ms before the first-dimming event.

589

## 590 Analysis of cell type.

591 We distinguished between different cell types based on the duration of the extracellular spike  
592 waveform as described in Thiele et al. (2016). Specifically, we classified cells based on the  
593 peak-to-trough ratio, i.e. the duration between the peak and the trough of the interpolated  
594 (cubic spline) spike waveform. To test whether the distribution of peak-to-trough distance of  
595 the spike waveforms was unimodal (null hypothesis) or bimodal, indicating that our  
596 distribution contained different cell types, a modified Hartigan's dip test was used (Ardid et  
597 al., 2015; Thiele et al., 2016). We used a cut-off of 250  $\mu$ s to classify cells as narrow or  
598 broad-spiking, as this was where our distribution revealed the main 'dip' (Figure 3A-B).

599

## 600 Fano factor

601 The variability of neural responses was quantified using Fano factors ( $FF$ ), computed as the  
602 ratio between the variance ( $\sigma^2$ ) and the mean ( $\mu$ ) spike counts within the time window of  
603 interest, defined as:

$$604 \quad FF = \frac{\sigma^2}{\mu}$$

605

## 606 Drug modulation

607 The strength of the effect of drug application on neural activity (firing rates) was determined  
608 via a drug modulation index ( $drugMI$ ), defined as:

$$609 \quad drugMI = \frac{drug_{on} - drug_{off}}{drug_{on} + drug_{off}}$$

610 with  $drug_{on}$  as the neural activity when drug was applied, and  $drug_{off}$  the activity when the  
611 drug was not applied. This index ranges from -1 to 1, with zero indicating no modulation due  
612 to drug application and with positive values indicating higher activity when the drug was  
613 applied and conversely, negative values indicating lower activity.

614

## 615 Quantification of attentional rate modulation.

616 To quantify the difference between neural responses when attention was directed towards the  
617 RF versus away from the RF, we computed the area under the receiver operating  
618 characteristic (AUROC) curve. Stemming from signal detection theory (Green and Swets,  
619 1966), this measure represents the difference between two distributions as a single scalar  
620 value, taking into account both the average difference in magnitude as well as the variability  
621 of each distribution. This value indicates how well an ideal observer would be able to

622 distinguish between two distributions, for example the neural response when attention is  
623 directed towards versus away from its RF. It is computed by iteratively increasing the  
624 threshold and computing the proportion (from the first sample to the threshold) of hits and  
625 false alarms (FA), i.e. the correct and false classification as samples belonging to one of the  
626 activity distributions. The ROC curve is generated by plotting the proportions of hits against  
627 the proportion of FAs, and AUROC is taken as the area under the ROC curve. An AUROC of  
628 0.5 indicates that the two distributions were indistinguishable, whereas an AUROC of 0 or 1  
629 indicates that the two distributions were perfectly separable. As the difference from 0.5  
630 indicates the separability of the distributions, we corrected AUROC values (1-AUROC) for  
631 both drug conditions when they were below 0.5 when no drugs were applied, i.e. for those  
632 units that displayed higher activity when attention was directed towards the distractors  
633 compared to when attention was directed towards the RF.

634

### 635 Gain variability

636 Neural activity displays super-Poisson variability (larger variance than the mean), resulting  
637 from trial-to-trial changes in excitability, that can be modeled by fitting a negative binomial  
638 distribution to the spike rate histogram. This distribution is characterized by a dispersion  
639 parameter that captures this additional variability and has been proposed to reflect stimulus-  
640 independent modulatory influences on excitability (Goris et al., 2014). For each unit, we fit  
641 the distribution of firing rates recorded during the 500 ms before the first dimming with a  
642 negative binomial distribution and obtained a gain variance (dispersion) term that captures  
643 trial-to-trial changes in excitability, separately for each drug and attention condition (but  
644 across stimulus direction conditions).

645

## 646 Experimental design and statistical analysis

647 We recorded single (SU, n=40) and multi-unit (MU, n=48) activity (total 88 units; 64 from  
648 monkey 1, 24 from monkey 2) from two male rhesus macaque monkeys (*Macaca mulatta*,  
649 age 9-11 years, weight 8-12.9 kg). We recorded an additional 12 units during saline-control  
650 recordings from one female macaque monkey (11 years, 9.1 kg).

651 To determine whether DA significantly affected neural activity across the population of units,  
652 we used linear mixed-effect models using the R packages *lme4* (Bates et al., 2015) and  
653 *lmerTest* (Kuznetsova et al., 2017). The modulation of neural activity (firing rates, Fano  
654 Factors or gain variability) was modeled as a linear combination of categorical (effect coded)  
655 factors drug (on/off), attention (RF/away), unit type (narrow/broad) and all possible  
656 interactions as fixed effects with random intercepts for each unit. We sequentially entered  
657 predictors into a hierarchical model and tested the model fit after the addition of each  
658 predictor using likelihood ratio tests. For small sample sizes, the  $\chi^2$  approximation employed  
659 in likelihood ratio tests can lead to misleading conclusions. We therefore additionally report  
660 the Kenward-Roger approximation for performing F tests to control for Type I errors  
661 (Halekoh and Højsgaard, 2014; Kenward and Roger, 1997; Singmann and Kellen, 2019)  
662 using the R package *pbkrtest* (Halekoh and Højsgaard, 2014). To aid interpretation of model  
663 fit statistics, we also report Bayes Factors, computed from the sample size, number of  
664 predictors and  $R^2$  values (Andraszewicz et al., 2015; Rouder and Morey, 2012) using the R  
665 package *BayesFactor* (Morey and Rouder, 2018). Finally, to confirm whether each of the  
666 measures had a significant effect on neural activity, we performed “robust regression” based  
667 on 5000 bootstrap replicates to calculate the 95% CI around slope estimates for the full  
668 model. The reported coefficients are the estimates from the full model and the robust  
669 regression. Reported significance values are the results from likelihood ratio tests. We



670 followed these analyses up with linear mixed-effect model tests within each unit type and  
671 two-sided paired-sample Wilcoxon signed rank tests.

672 For comparisons within one recording, e.g. spike rates across trials for different conditions,  
673 we used analysis of variance (ANOVA) with three factors: attention (towards/away from the  
674 RF), drug (on/off) and stimulus direction. To test whether drug application affected  
675 behavioral performance, we used sequential linear mixed effects models with attention and  
676 drug as fixed effects and with the recording number as a random effect, to account for the  
677 repeated measurements in the data.

678 To test for significant linear or quadratic trends in the drug dose-response curve, we used  
679 sequential linear mixed effects models and likelihood ratio tests. For each drug, we tested  
680 whether a first order (linear) polynomial fit was better than a constant (intercept-only) fit and  
681 subsequently whether a second order (non-monotonic) polynomial fit was better than a linear  
682 fit. The modulation due to drug application of the neural response  $y$  was modeled as a linear  
683 combination of polynomial basis functions of the iontophoretic ejection current  $X$ :

684 
$$y \sim \beta_0 + \beta_1 X + \beta_2 X^2$$

685 , with  $\beta$  as the polynomial coefficients. When a significant quadratic relationship was found,  
686 we used the two-lines approach to determine whether this relationship was significantly U-  
687 shaped (Simonsohn, 2017).

688 Error bars in all violin plots indicate the interquartile range and the standard error of the mean  
689 (SEM) otherwise. We used false discovery rate (FDR) to correct for multiple comparisons.

690 We selected which cells to include in each of the analyses based on the output of the 3-factor  
691 ANOVA described above. For example, if we wanted to investigate whether drug application

692 affected attentional modulation of firing rates, we only included cells that revealed a main or  
693 interaction effect for both attention and drug application.

694

#### 695 [Data and code availability](#)

696 Data analyses were performed using custom written scripts in Matlab (the Mathworks) and  
697 RStudio (RStudio Team (2016). RStudio: Integrated Development for R. RStudio, Inc., Bos-  
698 ton, MA URL <http://www.rstudio.com>). Violin plots were created using publicly available  
699 Matlab code (Bechtold, 2016). Data and analysis scripts necessary to reproduce these results  
700 will be made available upon acceptance of this manuscript.

701

#### 702 [Acknowledgements](#)

703 This work was supported by Wellcome trust [093104] (JvK, AT), MRC [MR/P013031/1]  
704 (JvK, AT); by a Senior Research Fellowship from the Australian National Health and  
705 Medical Research Council (NHMRC) (MAB); and by a strategic research partnership  
706 between Newcastle University and Monash University (JvK, MAB, AT).

707

#### 708 [Competing interests](#)

709 There are no conflicts of interest.

710

711

## 712 References

- 713 Andraszewicz S, Scheibehenne B, Rieskamp J, Grasman R, Verhagen J, Wagenmakers EJ.  
714 2015. An Introduction to Bayesian Hypothesis Testing for Management Research. *J*  
715 *Manage* **41**:521–543. doi:10.1177/0149206314560412
- 716 Ardid S, Vinck M, Kaping D, Marquez S, Everling S, Womelsdorf T. 2015. Mapping of  
717 functionally characterized cell classes onto canonical circuit operations in primate  
718 prefrontal cortex. *J Neurosci*. doi:10.1523/JNEUROSCI.2700-14.2015
- 719 Arnsten AFT, Cai JX, Murphy BL, Goldman-Rakic PS. 1994. Dopamine D1 receptor  
720 mechanisms in the cognitive performance of young adult and aged monkeys.  
721 *Psychopharmacology (Berl)*. doi:10.1007/BF02245056
- 722 Arnsten AFT, Wang MJ, Paspalas CD. 2012. Neuromodulation of Thought: Flexibilities and  
723 Vulnerabilities in Prefrontal Cortical Network Synapses. *Neuron* **76**:223–239.  
724 doi:10.1016/j.neuron.2012.08.038
- 725 Bates D, Mächler M, Bolker B, Walker S. 2015. Fitting Linear Mixed-Effects Models Using  
726 lme4. *J Stat Softw* **67**. doi:10.18637/jss.v067.i01
- 727 Bechtold B. 2016. Violin Plots for Matlab, Github Project. doi:10.5281/zenodo.4559847
- 728 Becker W. 1989. The neurobiology of saccadic eye movements. Metrics. *Rev Oculomot Res*  
729 **3**:13–67. doi:044481017X
- 730 Bellgrove MA, Barry E, Johnson KA, Cox M, Dáibhis A, Daly M, Hawi Z, Lambert D,  
731 Fitzgerald M, McNicholas F, Robertson IH, Gill M, Kirley A. 2008. Spatial attentional  
732 bias as a marker of genetic risk, symptom severity, and stimulant response in ADHD.  
733 *Neuropsychopharmacology* **33**:2536–2545. doi:10.1038/sj.npp.1301637
- 734 Bellgrove MA, Chambers CD, Johnson KA, Daibhis A, Daly M, Hawi Z, Lambert D, Gill M,

- 735       Robertson IH. 2007. Dopaminergic genotype biases spatial attention in healthy children.  
736       *Mol Psychiatry* **12**:786–792. doi:10.1038/sj.mp.4002022
- 737       Bellgrove MA, Johnson KA, Barry E, Mulligan A, Hawi Z, Gill M, Robertson I, Chambers  
738       CD. 2009. Dopaminergic Haplotype as a Predictor of Spatial Inattention in Children  
739       With Attention-Deficit/Hyperactivity Disorder. *Arch Gen Psychiatry* **66**:1135.  
740       doi:10.1001/archgenpsychiatry.2009.120
- 741       Bellgrove MA, Mattingley JB. 2008. Molecular genetics of attention *Annals of the New York*  
742       Academy of Sciences. pp. 200–212. doi:10.1196/annals.1417.013
- 743       Berger B, Gaspar P, Verney C. 1991. Dopaminergic innervation of the cerebral cortex:  
744       Unexpected differences between rodents and primates. *Trends Neurosci* **14**:21–27.  
745       doi:10.1016/0166-2236(91)90179-X
- 746       Binda P, Gamlin PD. 2017. Renewed Attention on the Pupil Light Reflex. *Trends Neurosci*  
747       **40**:455–457. doi:10.1016/j.tins.2017.06.007
- 748       Binda P, Murray SO. 2015a. Spatial attention increases the pupillary response to light  
749       changes. *J Vis* **15**:1–1. doi:10.1167/15.2.1
- 750       Binda P, Murray SO. 2015b. Keeping a large-pupilled eye on high-level visual processing.  
751       *Trends Cogn Sci* **19**:1–3. doi:10.1016/j.tics.2014.11.002
- 752       Caspers S, Schleicher A, Bacha-Trams M, Palomero-Gallagher N, Amunts K, Zilles K. 2013.  
753       Organization of the human inferior parietal lobule based on receptor architectonics.  
754       *Cereb Cortex* **23**:615–628. doi:10.1093/cercor/bhs048
- 755       Clark CR, Geffen GM, Geffen LB. 1989. Catecholamines and the covert orientation of  
756       attention in humans. *Neuropsychologia* **27**:131–139. doi:10.1016/0028-3932(89)90166-  
757       8

- 758 Clark KL, Noudoost B. 2014. The role of prefrontal catecholamines in attention and working  
759 memory. *Front Neural Circuits* **8**:33. doi:10.3389/fncir.2014.00033
- 760 Corbetta M, Shulman GL. 2011. Spatial Neglect and Attention Networks. *Annu Rev Neurosci*  
761 **34**:569–599. doi:10.1146/annurev-neuro-061010-113731
- 762 Dasilva M, Brandt C, Alwin Gieselmann M, Distler C, Thiele A. 2021. Contribution of  
763 Ionotropic Glutamatergic Receptors to Excitability and Attentional Signals in Macaque  
764 Frontal Eye Field. *Cereb Cortex* 1–19. doi:10.1093/cercor/bhab007
- 765 Dasilva M, Brandt C, Gotthardt S, Gieselmann MA, Distler C, Thiele A. 2019. Cell class-  
766 specific modulation of attentional signals by acetylcholine in macaque frontal eye field.  
767 *Proc Natl Acad Sci* 201905413. doi:10.1073/pnas.1905413116
- 768 Desimone R, Duncan J. 1995. Neural Mechanisms of Selective Visual Attention. *Annu Rev*  
769 *Neurosci* **18**:193–222. doi:10.1146/annurev.ne.18.030195.001205
- 770 Distler C, Hoffmann K-P. 2001. Cortical Input to the Nucleus of the Optic Tract and Dorsal  
771 Terminal Nucleus (NOT-DTN) in Macaques: a Retrograde Tracing Study. *Cereb Cortex*  
772 **11**:572–580. doi:10.1093/cercor/11.6.572
- 773 Ebitz RB, Moore T. 2017. Selective Modulation of the Pupil Light Reflex by  
774 Microstimulation of Prefrontal Cortex. *J Neurosci* **37**:5008–5018.  
775 doi:10.1523/JNEUROSCI.2433-16.2017
- 776 Ferro D, van Kempen J, Boyd M, Panzeri S, Thiele A. 2021. Directed information exchange  
777 between cortical layers in macaque V1 and V4 and its modulation by selective attention.  
778 *Proc Natl Acad Sci* **118**:e2022097118. doi:10.1073/pnas.2022097118
- 779 Furey ML, Pietrini P, Haxby J V., Drevets WC. 2008. Selective effects of cholinergic  
780 modulation on task performance during selective attention. *Neuropsychopharmacology*.

- 781       doi:10.1038/sj.npp.1301461
- 782       Gieselmann MA, Thiele A. 2008. Comparison of spatial integration and surround suppression  
783       characteristics in spiking activity and the local field potential in macaque V1. *Eur J*  
784       *Neurosci* **28**:447–459. doi:10.1111/j.1460-9568.2008.06358.x
- 785       Gorgoraptis N, Mah YH, MacHner B, Singh-Curry V, Malhotra P, Hadji-Michael M, Cohen  
786       D, Simister R, Nair A, Kulinskaya E, Ward N, Greenwood R, Husain M. 2012. The  
787       effects of the dopamine agonist rotigotine on hemispatial neglect following stroke. *Brain*  
788       **135**:2478–2491. doi:10.1093/brain/aws154
- 789       Goris RLT, Movshon JA, Simoncelli EP. 2014. Partitioning neuronal variability. *Nat*  
790       *Neurosci* **17**:858–865. doi:10.1038/nn.3711
- 791       Gray H, Bertrand H, Mindus C, Flecknell P, Rowe C, Thiele A. 2016. Physiological,  
792       Behavioral, and Scientific Impact of Different Fluid Control Protocols in the Rhesus  
793       Macaque (*Macaca mulatta*). *Eneuro* **3**:1–15.
- 794       Green DM, Swets JA. 1966. Signal Detection Theory and Psychophysics. New York: Wiley.  
795       doi:10.1901/jeab.1969.12-475
- 796       Halekoh U, Højsgaard S. 2014. A Kenward-Roger Approximation and Parametric Bootstrap  
797       Methods for Tests in Linear Mixed Models - The R Package pbkrtest. *J Stat Softw* **59**:1–  
798       32. doi:10.18637/jss.v059.i09
- 799       Herrero JL, Gieselmann M a, Sanayei M, Thiele A. 2013. Attention-induced variance and  
800       noise correlation reduction in macaque v1 is mediated by NMDA receptors. *Neuron*  
801       **78**:729–739. doi:10.1016/j.neuron.2013.03.029
- 802       Herrero JL, Roberts MJ, Delicato LS, Gieselmann MA, Dayan P, Thiele A. 2008.  
803       Acetylcholine contributes through muscarinic receptors to attentional modulation in V1.

- 804 *Nature* **454**:1110–1114. doi:10.1038/nature07141
- 805 Herz A, Zieglgänsberger W, Färber G. 1969. Microelectrophoretic studies concerning the  
806 spread of glutamic acid and GABA in brain tissue. *Exp Brain Res* **9**.  
807 doi:10.1007/BF00234456
- 808 Ignashchenkova A, Dicke PW, Haarmeier T, Thier P. 2004. Neuron-specific contribution of  
809 the superior colliculus to overt and covert shifts of attention. *Nat Neurosci* **7**:56–64.  
810 doi:10.1038/nn1169
- 811 Jacob SN, Ott T, Nieder A. 2013. Dopamine regulates two classes of primate prefrontal  
812 neurons that represent sensory signals. *J Neurosci* **33**:13724–34.  
813 doi:10.1523/JNEUROSCI.0210-13.2013
- 814 Jacob SN, Stalter M, Nieder A. 2016. Cell-type-specific modulation of targets and distractors  
815 by dopamine D1 receptors in primate prefrontal cortex. *Nat Commun*.  
816 doi:10.1038/ncomms13218
- 817 Joshi S, Li Y, Kalwani RM, Gold JJ. 2016. Relationships between Pupil Diameter and  
818 Neuronal Activity in the Locus Coeruleus, Colliculi, and Cingulate Cortex. *Neuron*  
819 **89**:221–234. doi:10.1016/j.neuron.2015.11.028
- 820 Kenward MG, Roger JH. 1997. Small Sample Inference for Fixed Effects from Restricted  
821 Maximum Likelihood. *Biometrics* **53**:983. doi:10.2307/2533558
- 822 Kustov AA, Lee Robinson D. 1996. Shared neural control of attentional shifts and eye  
823 movements. *Nature* **384**:74–77. doi:10.1038/384074a0
- 824 Kuypers HGJM, Lawrence DG. 1967. Cortical projections to the red nucleus and the brain  
825 stem in the rhesus monkey. *Brain Res* **4**:151–188. doi:10.1016/0006-8993(67)90004-2
- 826 Kuznetsova A, Brockhoff PB, Christensen RHB. 2017. lmerTest Package: Tests in Linear

- 827 Mixed Effects Models. *J Stat Softw* **82**. doi:10.18637/jss.v082.i13
- 828 Levin ED, Simon BB. 1998. Nicotinic acetylcholine involvement in cognitive function in  
829 animals. *Psychopharmacology (Berl)* **138**:217–230. doi:10.1007/s002130050667
- 830 Lewis DA, Melchitzky DS, Sesack SR, Whitehead RE, Auh S, Sampson A. 2001. Dopamine  
831 transporter immunoreactivity in monkey cerebral cortex: Regional, laminar, and  
832 ultrastructural localization. *J Comp Neurol* **432**:119–136. doi:10.1002/cne.1092
- 833 Loewenfeld IE. 1993. The pupil: anatomy, physiology, and clinical applications. Detroit:  
834 Wayne State University.
- 835 Lovejoy LP, Krauzlis RJ. 2010. Inactivation of primate superior colliculus impairs covert  
836 selection of signals for perceptual judgments. *Nat Neurosci* **13**:261–266.  
837 doi:10.1038/nn.2470
- 838 Maruff P, Hay D, Malone V, Currie J. 1995. Asymmetries in the covert orienting of visual  
839 spatial attention in schizophrenia. *Neuropsychologia* **33**:1205–1223. doi:10.1016/0028-  
840 3932(95)00037-4
- 841 McDougal DH, Gamlin PD. 2014. Autonomic Control of the EyeComprehensive Physiology.  
842 Hoboken, NJ, USA: John Wiley & Sons, Inc. pp. 439–473. doi:10.1002/cphy.c140014
- 843 McPeck RM, Keller EL. 2004. Deficits in saccade target selection after inactivation of  
844 superior colliculus. *Nat Neurosci* **7**:757–763. doi:10.1038/nn1269
- 845 McPeck RM, Keller EL. 2002. Saccade target selection in the superior colliculus during a  
846 visual search task. *J Neurophysiol* **88**:2019–34. doi:10.1152/jn.2002.88.4.2019
- 847 Mehta MA, Owen AM, Sahakian BJ, Mavaddat N, Pickard JD, Robbins TW. 2000.  
848 Methylphenidate Enhances Working Memory by Modulating Discrete Frontal and  
849 Parietal Lobe Regions in the Human Brain. *J Neurosci* **20**:RC65–RC65.



- 850       doi:10.1523/JNEUROSCI.20-06-j0004.2000
- 851   Millan M, Newman-Tancredi A, Quentric Y, Cussac D. 2001. The “selective” dopamine D 1  
852       receptor antagonist, SCH23390, is a potent and high efficacy agonist at cloned human  
853       serotonin 2C receptors. *Psychopharmacology (Berl)* **156**:58–62.  
854       doi:10.1007/s002130100742
- 855   Mitchell JF, Sundberg K a, Reynolds JH. 2007. Differential Attention-Dependent Response  
856       Modulation across Cell Classes in Macaque Visual Area V4. *Neuron* **55**:131–141.  
857       doi:10.1016/j.neuron.2007.06.018
- 858   Morey RD, Rouder JN. 2018. BayesFactor: Computation of Bayes Factors for Common  
859       Designs.
- 860   Mueller A, Krock RM, Shepard S, Moore T. 2019. Dopamine Receptor Expression Among  
861       Local and Visual Cortex-Projecting Frontal Eye Field Neurons. *Cereb Cortex* 1–17.  
862       doi:10.1093/cercor/bhz078
- 863   Mueller A, Shepard SB, Moore T. 2018. Differential Expression of Dopamine D5 Receptors  
864       across Neuronal Subtypes in Macaque Frontal Eye Field. *Front Neural Circuits*.  
865       doi:10.3389/fncir.2018.00012
- 866   Muller JR, Philiastides MG, Newsome WT. 2005. Microstimulation of the superior colliculus  
867       focuses attention without moving the eyes. *Proc Natl Acad Sci* **102**:524–529.  
868       doi:10.1073/pnas.0408311101
- 869   Mysore SP, Knudsen EI. 2011. The role of a midbrain network in competitive stimulus  
870       selection. *Curr Opin Neurobiol* **21**:653–660. doi:10.1016/j.conb.2011.05.024
- 871   Naber M, Alvarez GA, Nakayama K. 2013. Tracking the allocation of attention using human  
872       pupillary oscillations. *Front Psychol*. doi:10.3389/fpsyg.2013.00919

- 873 Nelson CL, Sarter M, Bruno JP. 2005. Prefrontal cortical modulation of acetylcholine release  
874 in posterior parietal cortex. *Neuroscience* **132**:347–359.  
875 doi:10.1016/j.neuroscience.2004.12.007
- 876 Newman DP, Cummins TDR, Tong JHS, Johnson BP, Pickering H, Fanning P, Wagner J,  
877 Goodrich JTT, Hawi Z, Chambers CD, Bellgrove M a. 2014. Dopamine Transporter  
878 Genotype Is Associated with a Lateralized Resistance to Distraction during Attention  
879 Selection. *J Neurosci* **34**:15743–15750. doi:10.1523/JNEUROSCI.2327-14.2014
- 880 Noudoost B, Moore T. 2011a. Control of visual cortical signals by prefrontal dopamine.  
881 *Nature* **474**:372–375. doi:10.1038/nature09995
- 882 Noudoost B, Moore T. 2011b. The role of neuromodulators in selective attention. *Trends*  
883 *Cogn Sci*. doi:10.1016/j.tics.2011.10.006
- 884 Ott T, Jacob SN, Nieder A. 2014. Dopamine Receptors Differentially Enhance Rule Coding  
885 in Primate Prefrontal Cortex Neurons. *Neuron* **84**:1317–1328.  
886 doi:10.1016/j.neuron.2014.11.012
- 887 Ott T, Nieder A. 2019. Dopamine and Cognitive Control in Prefrontal Cortex. *Trends Cogn*  
888 *Sci* **23**:213–234. doi:10.1016/j.tics.2018.12.006
- 889 Parikh V, Kozak R, Martinez V, Sarter M. 2007. Prefrontal Acetylcholine Release Controls  
890 Cue Detection on Multiple Timescales. *Neuron* **56**:141–154.  
891 doi:10.1016/j.neuron.2007.08.025
- 892 Posner M. 1990. The Attention System Of The Human Brain. *Annu Rev Neurosci* **13**:25–42.  
893 doi:10.1146/annurev.neuro.13.1.25
- 894 Robbins TW, Arnsten AFT. 2009. The neuropsychopharmacology of fronto-executive  
895 function: monoaminergic modulation. *Annu Rev Neurosci* **32**:267–87.

- 896           doi:10.1146/annurev.neuro.051508.135535
- 897   Rouder JN, Morey RD. 2012. Default Bayes Factors for Model Selection in Regression.  
898           *Multivariate Behav Res* **47**:877–903. doi:10.1080/00273171.2012.734737
- 899   Sarter M, Hasselmo ME, Bruno JP, Givens B. 2005. Unraveling the attentional functions of  
900           cortical cholinergic inputs: Interactions between signal-driven and cognitive modulation  
901           of signal detection. *Brain Res Rev* **48**:98–111. doi:10.1016/j.brainresrev.2004.08.006
- 902   Sawaguchi T, Goldman-Rakic P. 1991. D1 dopamine receptors in prefrontal cortex:  
903           involvement in working memory. *Science (80- )* **251**:947–950.  
904           doi:10.1126/science.1825731
- 905   Sawaguchi T, Goldman-Rakic PS. 1994. The role of D1-dopamine receptor in working  
906           memory: local injections of dopamine antagonists into the prefrontal cortex of rhesus  
907           monkeys performing an oculomotor delayed-response task. *J Neurophysiol* **71**:515–528.  
908           doi:10.1152/jn.1994.71.2.515
- 909   Sawaguchi T, Matsumura M, Kubota K. 1990. Effects of dopamine antagonists on neuronal  
910           activity related to a delayed response task in monkey prefrontal cortex. *J Neurophysiol*  
911           **63**:1401–1412. doi:10.1152/jn.1990.63.6.1401
- 912   Seamans JK, Yang CR. 2004. The principal features and mechanisms of dopamine  
913           modulation in the prefrontal cortex. *Prog Neurobiol* **74**:1–58.  
914           doi:10.1016/j.pneurobio.2004.05.006
- 915   Silk TJ, Newman DP, Eramudugolla R, Vance A, Bellgrove MA. 2014. Influence of  
916           methylphenidate on spatial attention asymmetry in adolescents with attention deficit  
917           hyperactivity disorder (ADHD): Preliminary findings. *Neuropsychologia* **56**:178–183.  
918           doi:10.1016/j.neuropsychologia.2014.01.015

- 919 Simonsohn U. 2017. Two-Lines: A Valid Alternative to the Invalid Testing of U-Shaped  
920 Relationships with Quadratic Regressions. *Ssrn*. doi:10.2139/ssrn.3021690
- 921 Singmann H, Kellen D. 2019. An Introduction to Mixed Models for Experimental  
922 Psychology *New Methods in Cognitive Psychology*. Routledge. pp. 4–31.  
923 doi:10.4324/9780429318405-2
- 924 Soares D, Goldrick I, Lemon RN, Kraskov A, Greensmith L, Kalmar B. 2017. Expression of  
925 Kv3.1b potassium channel is widespread in macaque motor cortex pyramidal cells: A  
926 histological comparison between rat and macaque. *J Comp Neurol* **525**:2164–2174.  
927 doi:10.1002/cne.24192
- 928 Soltani A, Noudoost B, Moore T. 2013. Dissociable dopaminergic control of saccadic target  
929 selection and its implications for reward modulation. *Proc Natl Acad Sci U S A*  
930 **110**:3579–84. doi:10.1073/pnas.1221236110
- 931 Thiele A, Bellgrove MA. 2018. Neuromodulation of Attention. *Neuron* **97**:769–785.  
932 doi:10.1016/j.neuron.2018.01.008
- 933 Thiele A, Brandt C, Dasilva M, Gotthardt S, Chicharro D, Panzeri S, Distler C. 2016.  
934 Attention Induced Gain Stabilization in Broad and Narrow-Spiking Cells in the Frontal  
935 Eye-Field of Macaque Monkeys. *J Neurosci* **36**:7601–12.  
936 doi:10.1523/JNEUROSCI.0872-16.2016
- 937 Thiele A, Delicato LS, Roberts MJ, Gieselmann MA. 2006. A novel electrode-pipette design  
938 for simultaneous recording of extracellular spikes and iontophoretic drug application in  
939 awake behaving monkeys. *J Neurosci Methods* **158**:207–211.  
940 doi:10.1016/j.jneumeth.2006.05.032
- 941 van Kempen J, Gieselmann MA, Boyd M, Steinmetz NA, Moore T, Engel TA, Thiele A.

- 942 2021. Top-down coordination of local cortical state during selective attention. *Neuron*  
943 1–11. doi:10.1016/j.neuron.2020.12.013
- 944 Vigneswaran G, Kraskov A, Lemon RN. 2011. Large Identified Pyramidal Cells in Macaque  
945 Motor and Premotor Cortex Exhibit “Thin Spikes”: Implications for Cell Type  
946 Classification. *J Neurosci* **31**:14235–14242. doi:10.1523/jneurosci.3142-11.2011
- 947 Vijayraghavan S, Wang M, Birnbaum SG, Williams G V, Arnsten AFT. 2007. Inverted-U  
948 dopamine D1 receptor actions on prefrontal neurons engaged in working memory. *Nat*  
949 *Neurosci* **10**:376–384. doi:10.1038/nn1846
- 950 Wang C-A, Boehnke SE, White BJ, Munoz DP. 2012. Microstimulation of the Monkey  
951 Superior Colliculus Induces Pupil Dilation Without Evoking Saccades. *J Neurosci*  
952 **32**:3629–3636. doi:10.1523/JNEUROSCI.5512-11.2012
- 953 Wang C-A, Munoz DP. 2015. A circuit for pupil orienting responses: implications for  
954 cognitive modulation of pupil size. *Curr Opin Neurobiol* **33**:134–140.  
955 doi:10.1016/j.conb.2015.03.018
- 956 Warburton DM, Rusted JM. 1993. Cholinergic control of cognitive resources.  
957 *Neuropsychobiology* **28**:43–6. doi:10.1159/000118998
- 958 Watanabe M, Kodama T, Hikosaka K. 1997. Increase of Extracellular Dopamine in Primate  
959 Prefrontal Cortex During a Working Memory Task. *J Neurophysiol* **78**:2795–2798.  
960 doi:10.1152/jn.1997.78.5.2795
- 961 Williams G V, Goldman-Rakic PS. 1995. Modulation of memory fields by dopamine D1  
962 receptors in prefrontal cortex. *Nature* **376**:572–575. doi:10.1038/376572a0
- 963 Zahrt J, Taylor JR, Mathew RG, Arnsten AFT. 1997. Supranormal Stimulation of D 1  
964 Dopamine Receptors in the Rodent Prefrontal Cortex Impairs Spatial Working Memory

965 Performance. *J Neurosci* **17**:8528–8535. doi:10.1523/JNEUROSCI.17-21-08528.1997

966

967 Supplementary figures

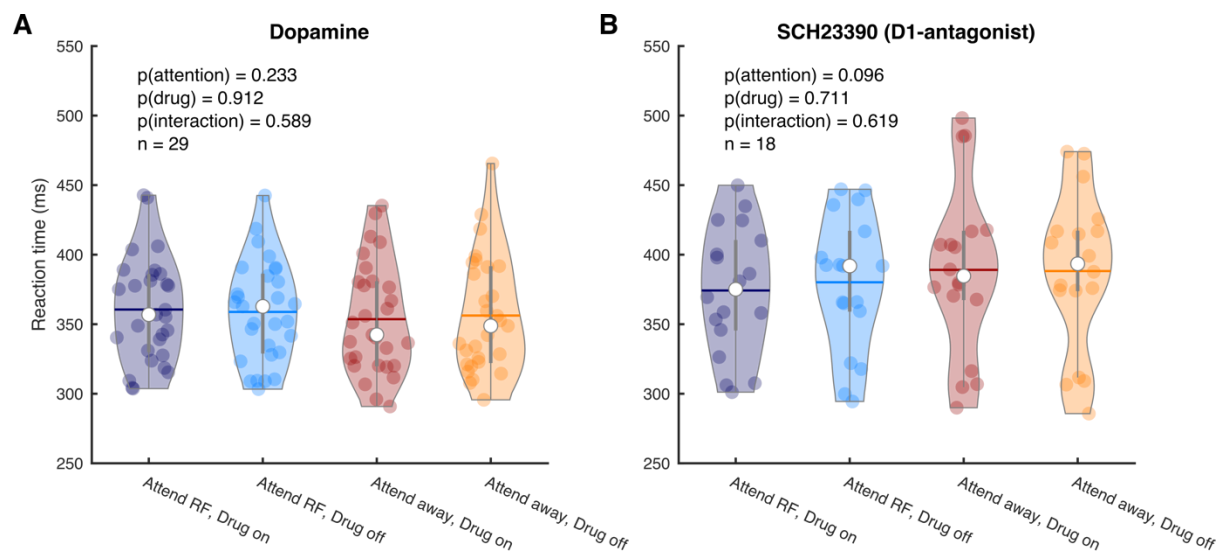

968

969 Supplementary figure 1. Behavioral performance is unaffected by iontophoretic application of dopaminergic  
970 drugs. Average RT on attend RF and attend away trials for the non-specific agonist dopamine (A) and the D1R  
971 antagonist SCH23390 (B). Individual markers represent the average RT during a single recording session. Error  
972 bars denote the interquartile range. Horizontal bars denote the mean. Statistics: linear mixed-effects model  
973 analysis.

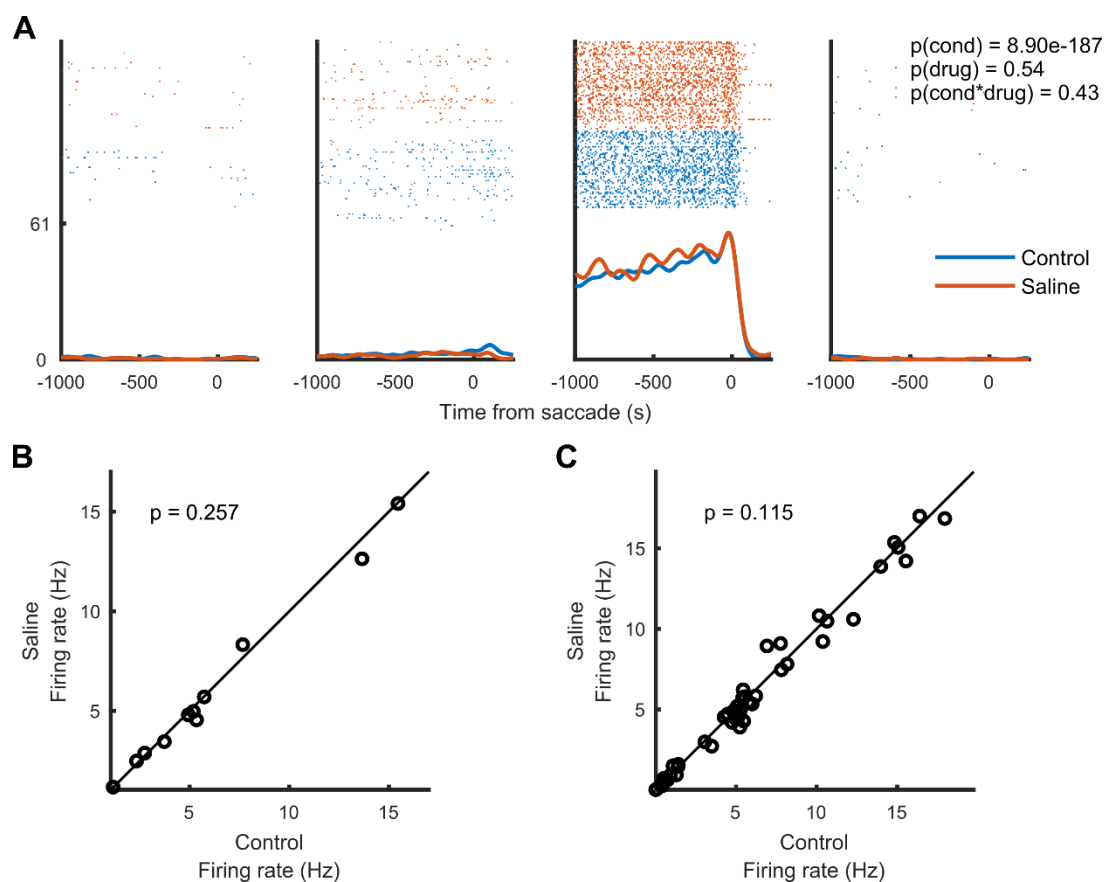

974

975 Supplementary figure 2. Application of saline with matched pH did not affect firing rates. (A) Activity from a  
976 representative cell recorded during application of saline (with pH matched to the dopaminergic drugs) whilst the  
977 monkey performed a memory-guided saccade task. The four panels correspond to the four quadrants in which  
978 the visual stimulus was presented. This cell's activity, aligned to saccade onset, was significantly modulated by  
979 the spatial location of the stimulus/saccade but not by iontophoretic saline application. Statistics: two-factor  
980 ANOVA. (B) Average firing rates between control and saline conditions. Each marker indicates the average  
981 activity of one unit across the four conditions. (C) Average firing rates between control and saline conditions.  
982 Each marker indicates the average activity of one unit for one of the four conditions. Statistics: two-sided  
983 Wilcoxon signed rank test.

984



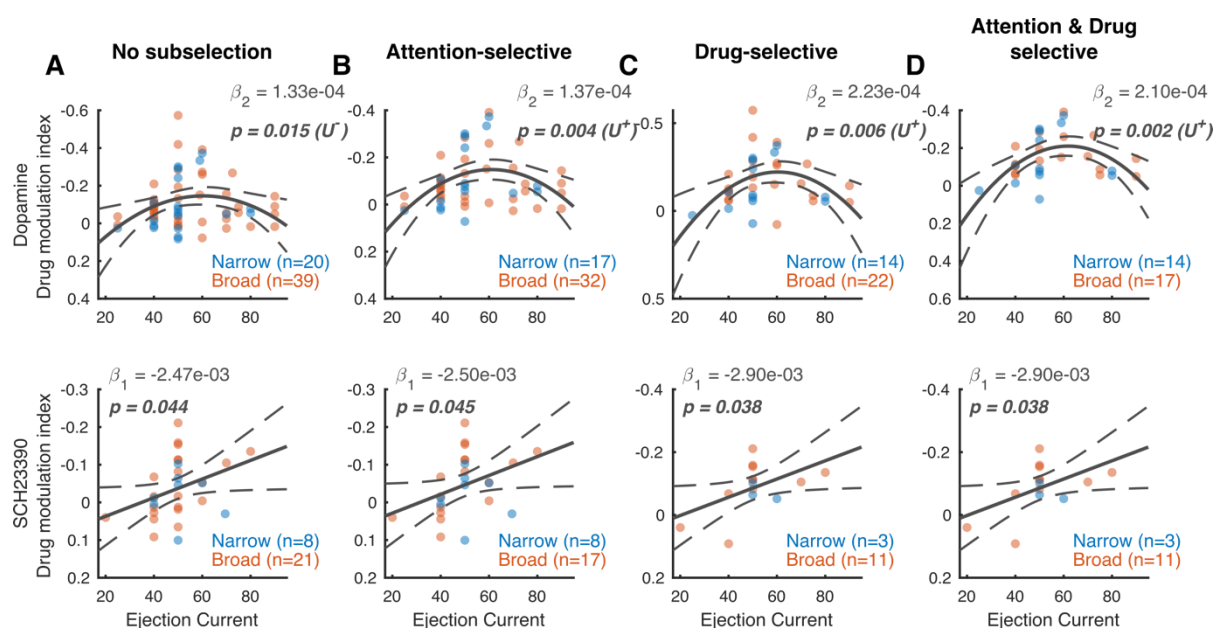

985

986 Supplementary figure 3. Dose-response curve: drug modulation of firing rates. Drug modulation index plotted

987 against ejection current for the non-specific agonist dopamine (top) and the D1R antagonist SCH23390 (bottom)

988 for (A) All units (B) units that revealed a main or interaction effect for the factor attention (C) units that

989 revealed a main or interaction effect for the factor drug and (D) units that revealed a main or interaction effect

990 for the factors attention and drug. Note the reversed y-axis. Solid and dotted lines represent significant model

991 fits (applied to all cells simultaneously) and their 95% confidence intervals, respectively. A monotonic

992 relationship is shown if a first-order fit was better than a constant fit, and a non-monotonic relationship is shown

993 if a second-order fit was better than a linear fit. *U*<sup>+</sup> indicates a significant U-shaped relationship. Statistics:

994 linear mixed-effects model analysis. Statistics deemed significant after multiple comparison correction are

995 displayed in italic and boldface fonts.

996

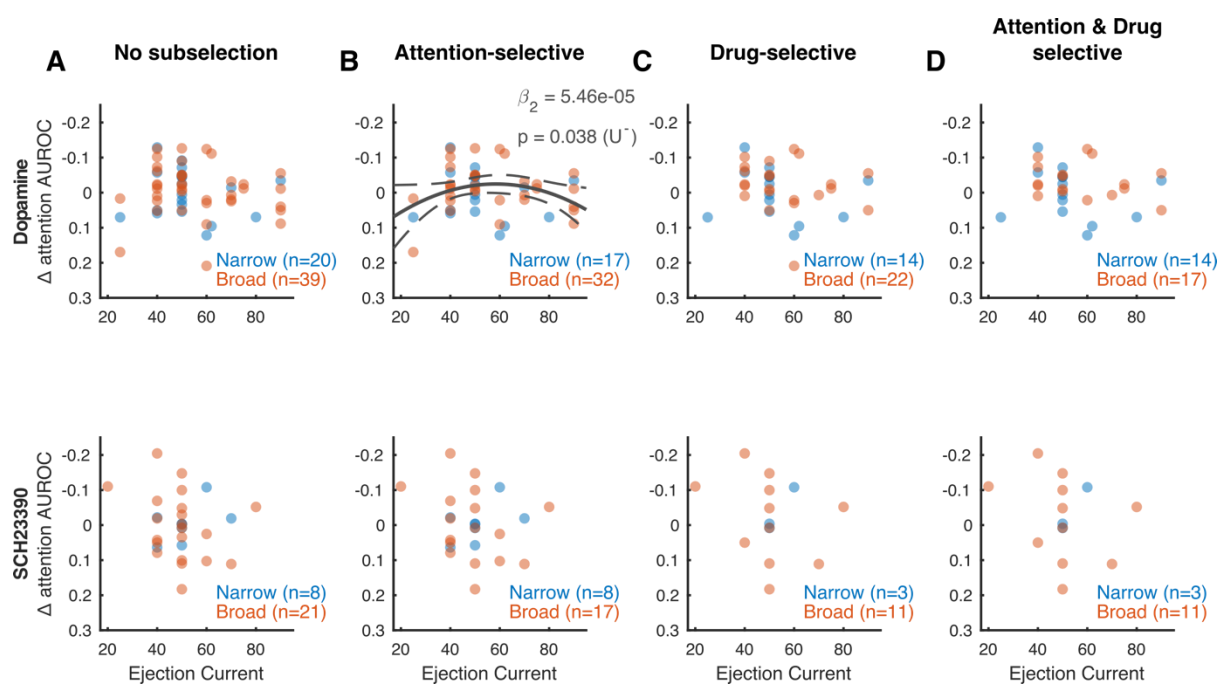

997

998 Supplementary figure 4. Dose-response curve: drug modulation of attention AUROC values. Attention AUROC

999 difference score (drug-no drug) plotted against ejection current for the non-specific agonist dopamine (top) and

1000 the D1R antagonist SCH23390 (bottom) for (A) All units (B) units that revealed a main or interaction effect for

1001 the factor attention (C) units that revealed a main or interaction effect for the factor drug and (D) units that

1002 revealed a main or interaction effect for the factors attention and drug. Note the reversed y-axis. Solid and

1003 dotted lines represent significant model fits (applied to all cells simultaneously) and their 95% confidence

1004 intervals, respectively. A monotonic relationship is shown if a first-order fit was better than a constant fit, and a

1005 non-monotonic relationship is shown if a second-order fit was better than a linear fit. U<sup>+</sup> indicates a significant

1006 U-shaped relationship. Statistics: linear mixed-effects model analysis. Statistics deemed significant after

1007 multiple comparison correction are displayed in italic and boldface fonts.
